# Supplementary material
Source: PubMed Central journal article supplement (PMC5182157)

**Cell Chemical Biology, Volume 23**

**Supplemental Information**

**Fluorescent Visualization  
of Cellular Proton Fluxes**

**Lejie Zhang, Karl Bellve, Kevin Fogarty, and William R. Kobertz**

## Supplemental Figures

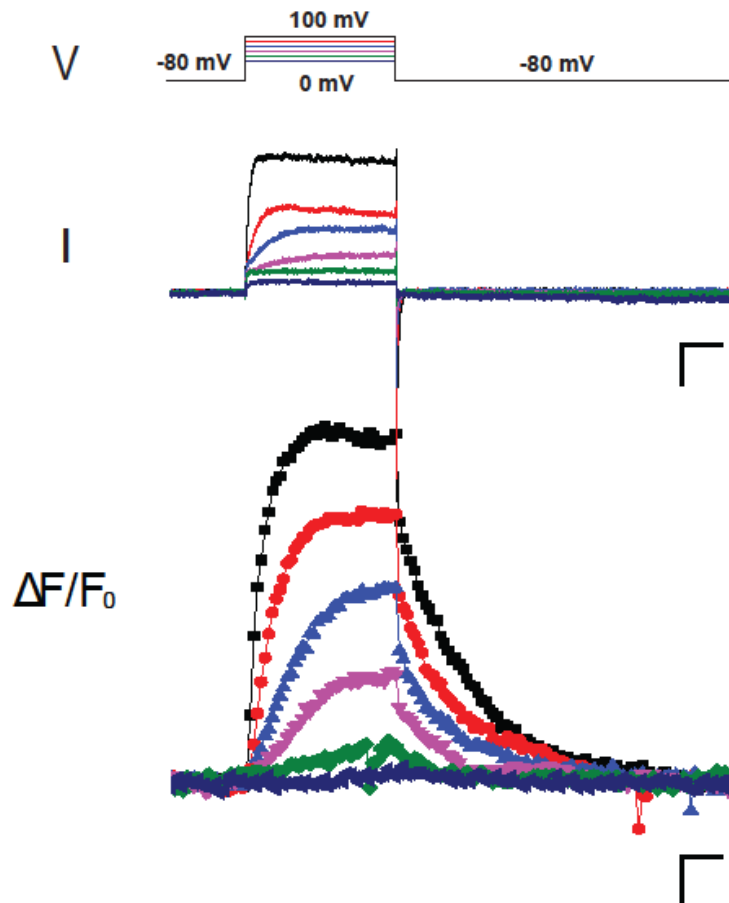

**Figure S1, related to Figure 2.** Voltage-clamp fluorometry of Hv-1 expressing HEK293T cells. The cell was held at  $-80$  mV, and currents and pH-DIBO fluorescence were elicited from 4-s command voltages from 0 to 100 mV in 20-mV increments. Scale bars represent 100 pA, 2% and 1 s;  $\text{pH}_o/\text{pH}_i = 7.5/6.0$  (0.1 mM HEPES).

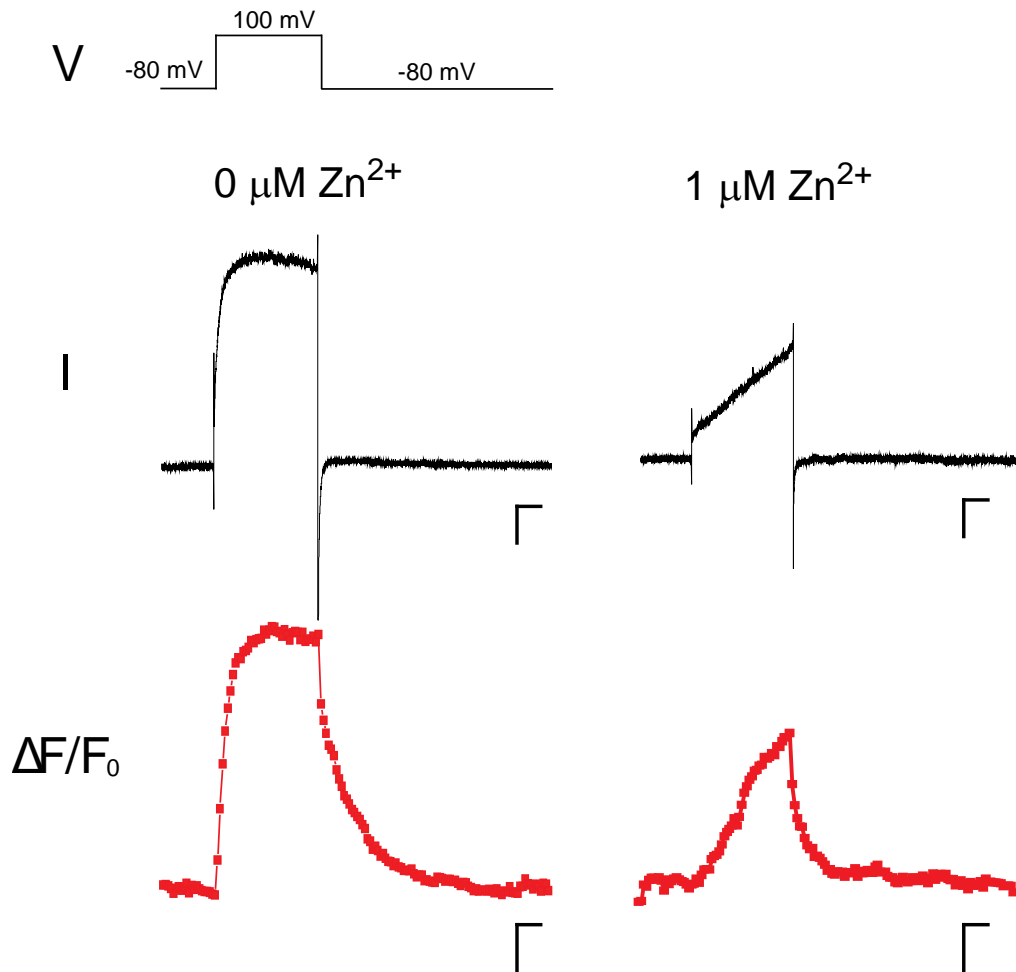

**Figure S2, related to Figure 2A.** Voltage-clamp fluorometry current and pH-DIBO fluorescent traces of Hv-1 expressing CHO cells in the presence or absence of  $\text{Zn}^{2+}$ . Scale bars represent 50 pA, 2% and 1 s;  $\text{pH}_o/\text{pH}_i = 7.5/6.0$  (0.1 mM HEPES).

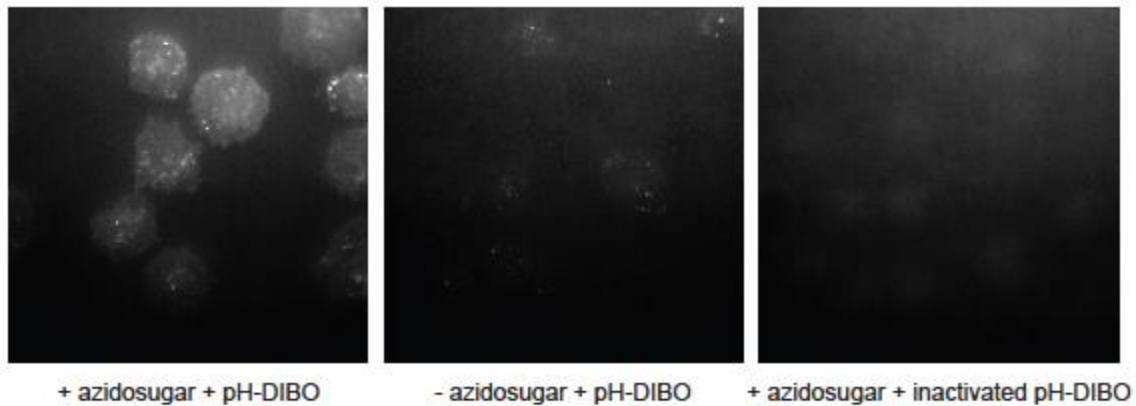

**Figure S3, related to Figure 2F.** TIRF images of cells incubated with or without azidosugar for 48 h and treated with either pH-DIBO or inactivated pH-DIBO (50  $\mu$ M, 30 min). pH-DIBO was inactivated by 3-azido-1-propanol (100 eq, 24 h). Images were acquired with an Olympus IX71 microscope with an 60 $\times$  1.49 Olympus objective and a 1.6 $\times$  optivar with TIRF illumination. Exposure was set to 100ms and the excitation light was provided by a Cobolt Jive 561 laser set to 20mW. Emitted light was first passed through a dual dichroic (525/50nm, 645/140nm) and then a 525/50nm band-pass. An Andor iXon EM+ 885i CCD (1004 $\times$ 1002 with 8 $\mu$ m<sup>2</sup> pixels) was used to collect the light.

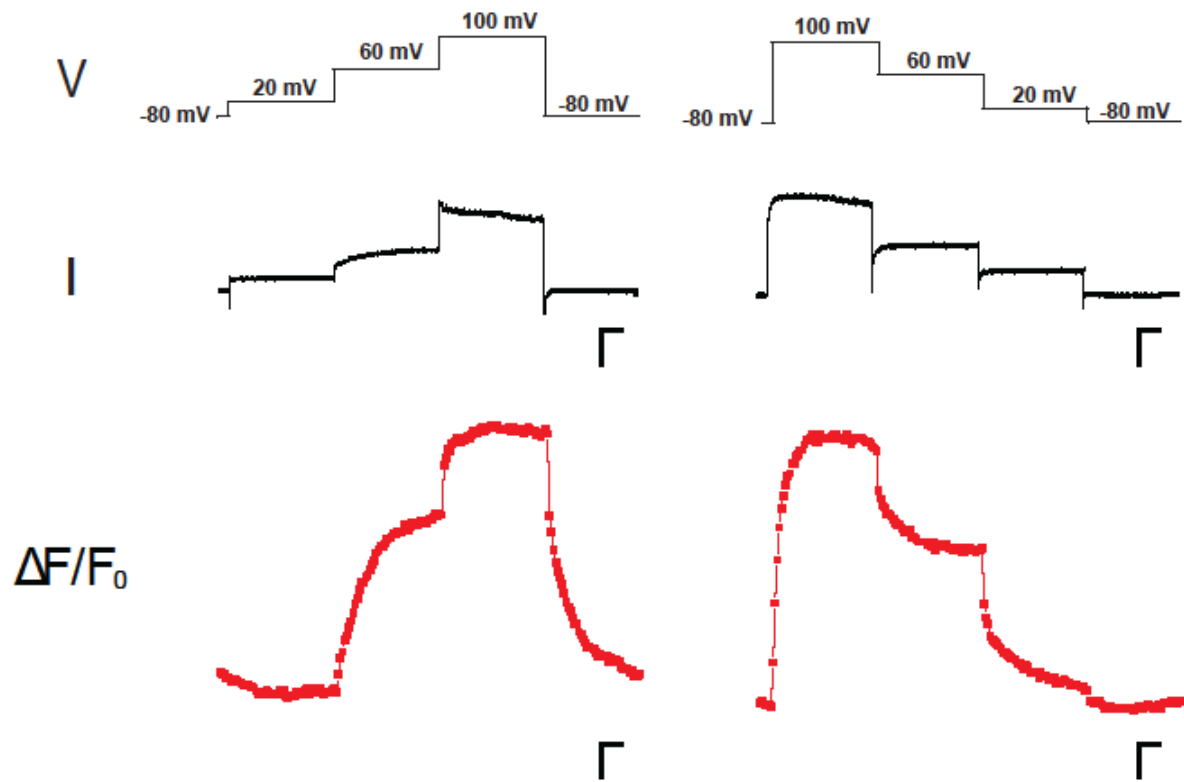

**Figure S4, related to Figure 2A.** Voltage-clamp fluorometry current and pH-DIBO fluorescent traces of Hv-1 expressing CHO cells for a series of voltage step-ups (*left*) or step-downs (*right*). Scale bars represent 100 pA, 2%, and 1 s;  $pH_o/pH_i = 7.5/6.0$  (0.1 mM HEPES).

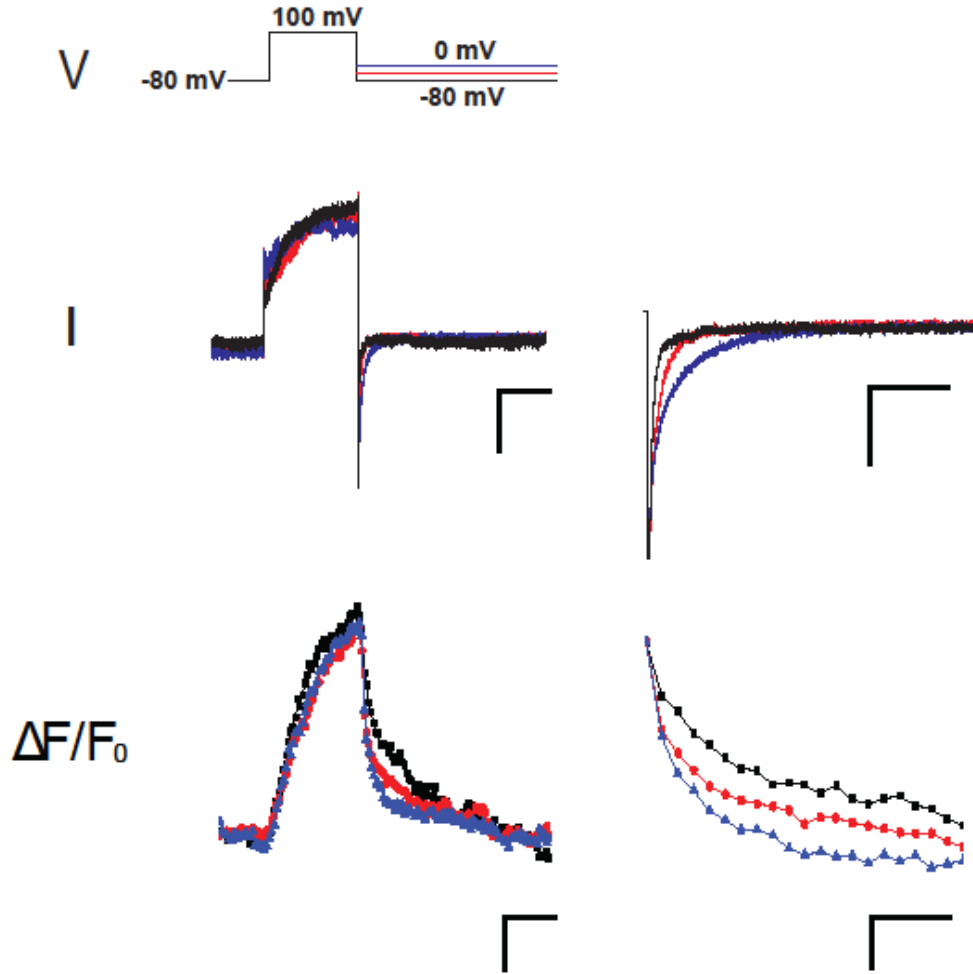

**Figure S5, related to Figure 2A, 2C, 3C and 4.** Tail current and pH-DIBO fluorescent decay kinetics at different closing voltages. Cells were held at  $-80$  mV, depolarized to  $100$  mV, and tail currents were elicited at  $0$  mV (blue),  $-40$  mV (red), and  $-80$  mV (black). Current and fluorescence traces of the entire voltage protocol are shown on the *left*. Scale bars represent  $50$  pA,  $2\%$ , and  $2$  s. Enlargement of the tail region are shown on the *right*. Scale bars represent  $50$  pA,  $2\%$ , and  $0.5$  s. No pH gradient was used:  $\text{pH}_o/\text{pH}_i = 7.0/7.0$  ( $0.1$  mM HEPES).

## Supplementary movie legends

**Supplementary movie 1, related to Figure 2A.**  $\Delta F$  movie of a representative CHO cell expressing Hv-1, the cell was held at  $-80$  mV, and depolarized at  $100$  mV for  $4$  s. The  $F_0$  was the fluorescence of the first frame. The frame rate is  $10$  fps.

**Supplementary movie 2, related to Figure 2A.** Raw fluorescence images of movie S1. The frame rate is  $30$  fps.

**Supplementary movie 3, related to Figure 4A.**  $\Delta F$  movie of a representative CHO cell expressing Shaker R362H, the cell was held at  $30$  mV, and hyperpolarized at  $-120$  mV for  $4$  s. The  $F_0$  was the fluorescence of the last frame at the  $-120$  mV command voltage. The frame rate is  $10$  fps.

**Supplementary movie 4, related to Figure 4A.** Raw fluorescence images of movie S3. The frame rate is  $30$  fps.

**Supplementary movie 5, related to Figure 4B.**  $\Delta F$  movie of a representative CHO cell expressing Hv-1 and its neighboring cells, the cell in the center was held at  $-80$  mV and depolarized at  $100$  mV for  $4$  s. The  $F_0$  was the fluorescence at the first frame. The frame rate is  $10$  fps.

**Supplementary movie 6, related to Figure 4B.** Raw fluorescence images of movie S5. The frame rate is  $30$  fps.

## Supplemental Experimental Procedures, related to Figure 1B

**General experimental procedures:** Unless otherwise stated, all reactions were run under an inert environment of argon (Ar) from which water and oxygen were rigorously excluded. Pentafluorobenzaldehyde and methanesulfonic acid were purchased from Acros. 3-(1-Piperazinyl) phenol was from Alfa Aesar. All other reagents and solvents were obtained from Sigma-Aldrich. Deuterated solvents were purchased from CIL. Thin layer chromatography was used to monitor the progress of reactions with EM Science silica gel 60 F<sub>254</sub> plates or neutral aluminum oxide F<sub>254</sub> plates from EMD Chemicals. Flash chromatography was performed using silica gel 60 (40-63 μm) from BDH. The final compound was purified by HPLC using a Higgins Analytical PROTO 300 C-18 column (10 μm), 250 × 10 mm (RS-2510-W181) on a Hewlett Packard Agilent 1100 HPLC instrument equipped with G1315A DAD absorbance detector. NMR spectra were recorded in CDCl<sub>3</sub>, CD<sub>3</sub>OD on a Varian 400 MHz spectrometer; <sup>1</sup>H NMR and <sup>13</sup>C NMR signals are reported in chemical shift relative to the NMR solvent peak; <sup>19</sup>F NMR are reported in chemical shift relative to an internal trifluoroacetic acid (TFA) standard. Coupling constants are reported as J values in Hz. NMR splitting patterns are abbreviated as follows: s = singlet, d = doublet, t = triplet, q = quartet, m = multiplet. Coupling constants (J) are reported in Hz. High resolution mass spectra (HRMS) were obtained on a Waters Q-TOF Premier Mass Spectrometer at the University of Massachusetts Medical School Proteomics and Mass Spectrometry Laboratory. Fluorescence spectroscopic measurements were performed on an F4500 (Hitachi).

### Compound 2 (Boc-pH)

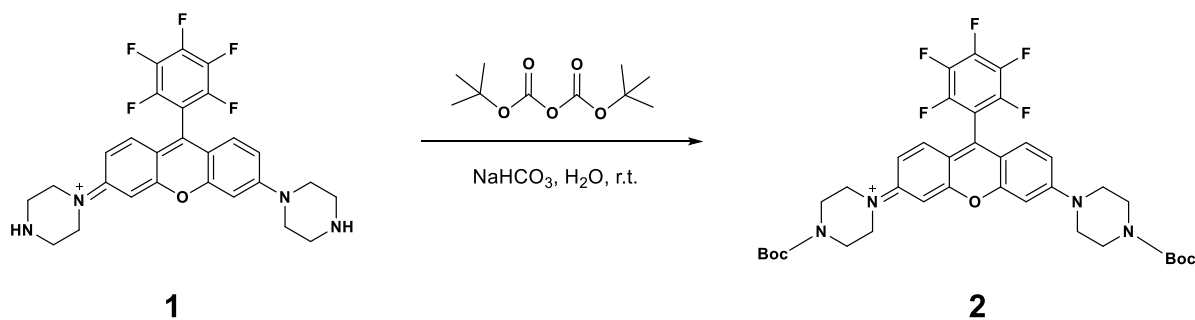

Crude 1 was synthesized following procedure described in the literature without further purification. Di-tert-butyl dicarbonate (4g, 18 mmol) was added to a stirred solution of crude 1 (4 g) and NaHCO<sub>3</sub> (2.7 g, 32 mmol) in H<sub>2</sub>O (100 mL). After being stirred at r.t. overnight, the reaction mixture was extracted with CH<sub>2</sub>Cl<sub>2</sub> (3 x 100 mL). The combined organic layers were washed with H<sub>2</sub>O (3 x 100 mL), dried (Na<sub>2</sub>SO<sub>4</sub>), filtered and the filtrate was concentrated under reduced pressure. The crude product was purified by chromatography over silica gel (50:1, v/v, CH<sub>2</sub>Cl<sub>2</sub>/Methanol) to give compound 2 (1.54 g, two steps yield 28%). <sup>1</sup>H-NMR (400 MHz, CD<sub>3</sub>OD) δ = 7.53 (d, J = 9.6 Hz, 2H), 7.36 (dd, J = 9.6, 2.4 Hz, 2H), 7.25 (d, J = 2.4 Hz, 2H), 3.93 – 3.84 (m, 8H), 3.68 (s, 8H), 1.50 (s, 18H). <sup>19</sup>F-NMR (376 MHz, CD<sub>3</sub>OD) δ = -138.80 (d, J = 17.6 Hz, 2F), -150.66 (t, J = 20.3 Hz, 1F), -160.47 (dt, J = 20.3, 5.6 Hz, 2F). <sup>13</sup>C-NMR (101 MHz, CD<sub>3</sub>OD) δ = 159.58,



158.91, 156.17, 131.93, 117.14, 115.59, 98.82, 81.91, 48.06, 28.60. HRMS (ESI):  $m/z$  calculated for  $C_{37}H_{40}F_5N_4O_5$  ( $M^+$ ): 715.2913; found: 715.2890.

### Compound 3 (Boc-pH-COOH)

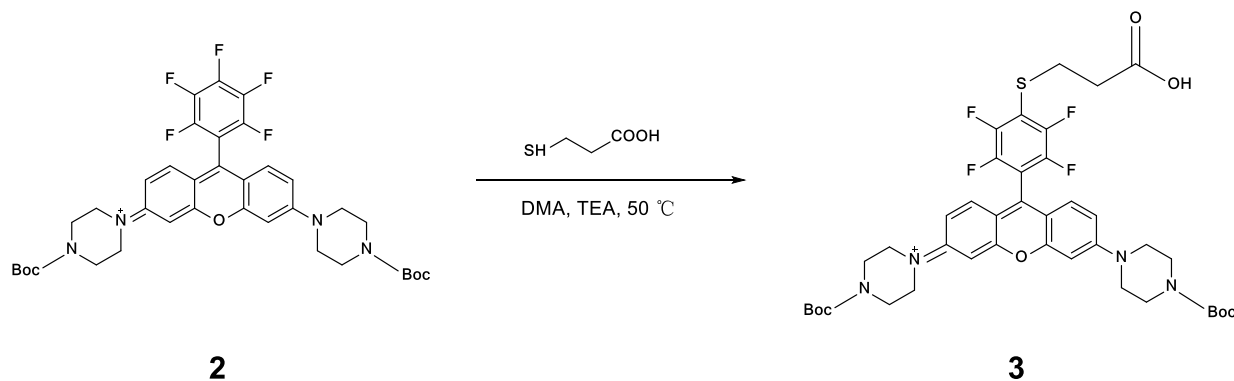

Compound 2 (580 mg, 0.8 mmol), *N,N*-dimethylacetamide (25 mL) and trimethylamine (720  $\mu$ L) were heated to 50  $^{\circ}$ C and 3-mercaptopropionic acid (100  $\mu$ L) was added dropwise. After being stirred at 50 for 3h, the solvents were evaporated under reduced pressure. The residue was dissolved in  $CH_2Cl_2$  (100 mL) and the resulting solution was washed with  $H_2O$  (3 x 50 mL), which was back extracted with  $CH_2Cl_2$  (3 x 30 mL). The combined organic layers were dried ( $Na_2SO_4$ ), filtered and concentrated under reduced pressure. The crude was purified by chromatography over silica gel (50:1  $\rightarrow$  10:1, v/v,  $CH_2Cl_2$ /Methanol) to give compound 3 (0.3 g, 46%).  $^1H$  NMR (400 MHz,  $CD_3OD$ )  $\delta$  = 7.54 (d,  $J$  = 9.5 Hz, 2H), 7.36 (dd,  $J$  = 9.5, 2.4 Hz, 2H), 7.26 (d,  $J$  = 2.4 Hz, 2H), 3.95 – 3.81 (m, 8H), 3.68 (s, 8H), 3.39 – 3.33 (m, 2H), 2.73 – 2.64 (m, 2H), 1.50 (s, 18H).  $^{19}F$ -NMR (376 MHz,  $CD_3OD$ )  $\delta$  = -131.87 (2F, dd,  $J$  = 25.8, 12.4 Hz, 2F), -138.96 (dd,  $J$  = 26.8, 14.5 Hz, 2F).  $^{13}C$  NMR (101 MHz,  $CD_3OD$ )  $\delta$  = 159.52, 158.85, 156.16, 132.04, 117.14, 115.38, 98.84, 81.86, 48.06, 31.25, 28.60. HRMS (ESI):  $m/z$  calculated for  $C_{40}H_{45}F_4N_4O_7S$  ( $M^+$ ): 801.2940; found: 801.2933.

### Compound 4 (Boc-pH-NH2)

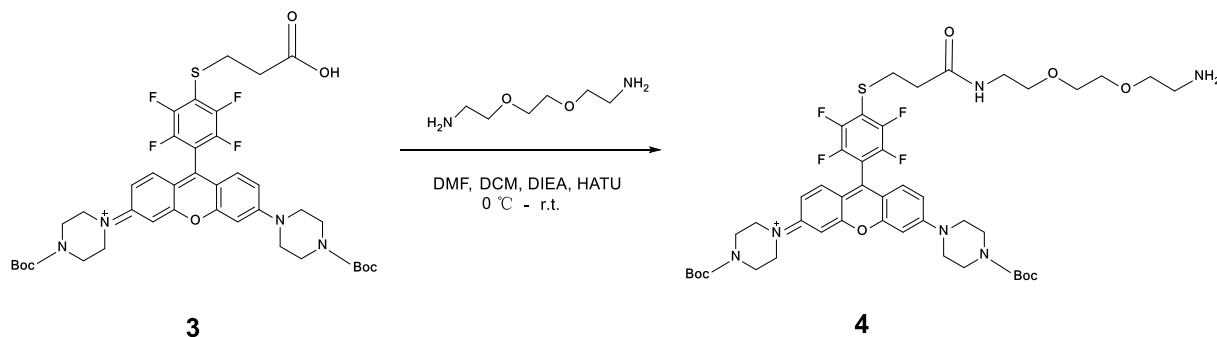

N,N-Diisopropylethylamine (90 mg, 0.7 mmol) and 1-[Bis(dimethylamino)methylene]-1H-1,2,3-triazolo[4,5-b]pyridinium 3-oxid hexafluorophosphate (171 mg, 0.45 mmol) was added slowly to a stirred solution of compound 3 (300 mg, 0.37 mmol), 2, 2'-(Ethylenedioxy) bis(ethylamine) (555 mg, 3.7 mmol), DMF (5mL) and CH<sub>2</sub>Cl<sub>2</sub> (5 mL) at 0 °C. After being stirred at r.t. for 2 h, the solvents were evaporated under reduced pressure. The residue was dissolved in CH<sub>2</sub>Cl<sub>2</sub> (50 mL) and the resulting solution was washed with brine (3 x 50 mL), H<sub>2</sub>O (3 x 50 mL) which was back extracted with CH<sub>2</sub>Cl<sub>2</sub> (3 x 30 mL). The combined organic layers were dried (Na<sub>2</sub>SO<sub>4</sub>), filtered and concentrated under reduced pressure. The crude was purified by chromatography over silica gel (50:1 -> 10:1, v/v, CH<sub>2</sub>Cl<sub>2</sub>/Methanol) to give compound 4 (0.2 g, 57%). <sup>1</sup>H NMR (400 MHz, CD<sub>3</sub>OD) δ = 7.58 (d, J = 9.6 Hz, 2H), 7.38 (dd, J = 9.6, 2.4 Hz, 2H), 7.26 (d, J = 2.4 Hz, 2H), 3.93 – 3.82 (m, 8H), 3.72 – 3.64 (m, 12H), 3.58 (t, J = 5.7 Hz, 4H), 3.37 (dd, J = 9.7, 4.1 Hz, 4H), 3.11 – 3.05 (m, 2H), 2.67 (t, J = 6.8 Hz, 2H), 1.50 (s, 18H). <sup>19</sup>F NMR (376 MHz, CD<sub>3</sub>OD) δ = -131.63 (dd, J = 25.1, 12.6 Hz, 2F), -138.89 (dd, J = 24.5, 11.9 Hz, 2F). <sup>13</sup>C NMR (101 MHz, CD<sub>3</sub>OD) δ = 173.21, 159.57, 158.90, 156.18, 117.11, 115.41, 98.82, 81.92, 71.35, 70.55, 67.93, 48.06, 40.67, 40.31, 37.46, 31.52, 28.60. HRMS (ESI): m/z calculated for C<sub>46</sub>H<sub>59</sub>F<sub>4</sub>N<sub>6</sub>O<sub>8</sub>S (M<sup>+</sup>): 931.4046; found: 931.4034.

#### Compound 5 (Boc-pH-DIBO)

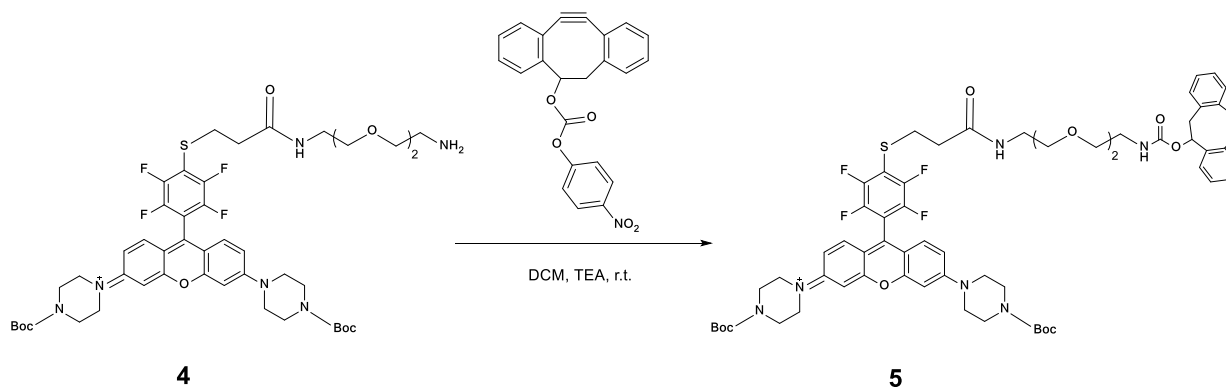

DIBO-4-nitrophenyl ester (196 mg, 0.51 mmol) was added to a stirred solution of compound 4 (240 mg, 0.26 mmol) and triethylamine (36 uL, 0.26 mmol) in CH<sub>2</sub>Cl<sub>2</sub> (30 mL). After being stirred at r.t. for 16 h, the solvent were evaporated under reduced pressure. The residue was dissolved in CH<sub>2</sub>Cl<sub>2</sub> (50 mL) and the resulting solution was washed with H<sub>2</sub>O (3 x 50 mL), which was back extracted with CH<sub>2</sub>Cl<sub>2</sub> (3 x 30 mL). The combined organic layers were dried (Na<sub>2</sub>SO<sub>4</sub>, filtered and concentrated under reduced pressure. The crude was purified by chromatography over silica gel (50:1 -> 20: 1, v/v, CH<sub>2</sub>Cl<sub>2</sub>/Methanol) to give compound 5 (110 mg, 36%). <sup>1</sup>H NMR (400 MHz, CD<sub>3</sub>OD) δ = 7.48 (dd, J = 12.3, 8.7 Hz, 4H), 7.35 – 7.21 (m, 8H), 7.14 (d, J = 2.1 Hz, 2H), 5.29 (s, 1H), 3.89 – 3.77 (m, 8H), 3.63 (d, J = 6.2 Hz, 12H), 3.54 (t, J = 5.1 Hz, 4H), 3.37 – 3.33 (m, 4H), 3.26 (t, J = 5.2 Hz, 2H), 3.12 (dd, J = 15.1, 2.1 Hz, 1H), 2.68 (dd, J = 15.1, 3.9 Hz, 1H), 2.60 (t, J = 6.7 Hz, 2H), 1.51 (s, 18H). <sup>19</sup>F NMR (376 MHz, CD<sub>3</sub>OD) δ = -131.27 (dd, J = 27.3, 14.7 Hz, 2F), -138.41 (dd, J = 26.8, 14.2 Hz, 2F). <sup>13</sup>C NMR (101 MHz, CDCl<sub>3</sub>) δ = 171.40, 158.10, 157.33, 155.94, 154.44, 152.42, 151.37, 132.65,

130.24, 128.17, 128.14, 126.97, 126.94, 126.02, 125.84, 124.36, 123.78, 121.09, 116.32, 114.74, 112.90, 110.12, 97.45, 81.07, 70.46, 70.34, 70.22, 70.05, 47.19, 46.24, 40.99, 39.22, 36.61, 30.43, 28.48. HRMS (ESI): m/z calculated for C<sub>63</sub>H<sub>69</sub>F<sub>4</sub>N<sub>6</sub>O<sub>10</sub>S (M<sup>+</sup>): 1177.4727; found: 1177.4729.

### Compound 6 (pH-DIBO)

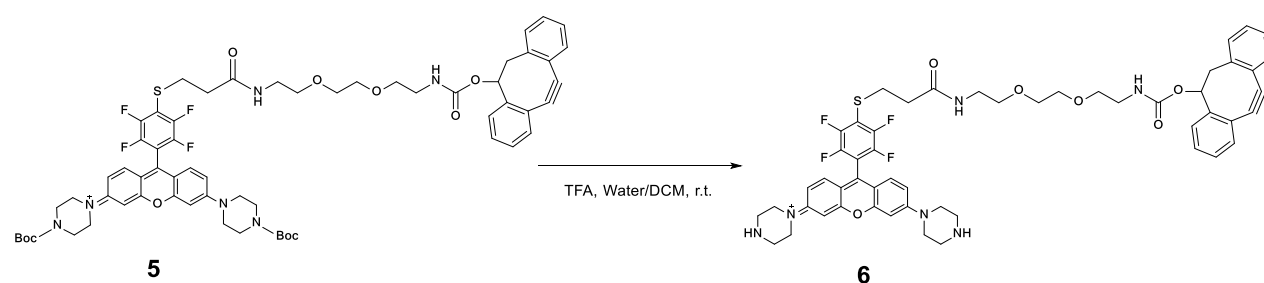

Trifluoroacetic acid (5 mL) was added dropwise to a stirred solution of compound 5 (100 mg, 0.085 mmol) in CH<sub>2</sub>Cl<sub>2</sub> (5 mL), H<sub>2</sub>O (1 mL). After being stirred at r.t. for 1.5 h, the solvents were evaporated under reduced pressure. The residue was dissolved in H<sub>2</sub>O (25 mL) and the resulting solution was washed with CH<sub>2</sub>Cl<sub>2</sub> (3 x 20 mL). The aqueous layers were concentrated under reduced pressure and purified by HPLC. 25 mg crude yielded 15 mg pure compound 6. If up-scaled, 60 mg (0.051 mmol, 72%). <sup>1</sup>H NMR (400 MHz, CD<sub>3</sub>OD) δ = 7.59 (d, J = 9.5 Hz, 2H), 7.51 (d, J = 7.9 Hz, 1H), 7.38 (d, J = 9.6 Hz, 3H), 7.33 (s, 4H), 7.30 – 7.24 (m, 4H), 5.31 (s, 1H), 4.07 (d, J = 4.6 Hz, 8H), 3.62 (s, 4H), 3.54 (d, J = 2.6 Hz, 4H), 3.44 (d, J = 4.7 Hz, 8H), 3.35 (m, 4H), 3.27 (t, J = 5.5 Hz, 2H), 3.15 (dd, J = 15.1 Hz, 1H), 2.75 – 2.67 (m, 1H), 2.61 (t, J = 6.7 Hz, 2H). <sup>19</sup>F NMR (376 MHz, CD<sub>3</sub>OD) δ = -132.77 (dd, J = 27.2, 14.4 Hz, 2F), -139.95 (dd, J = 27.1, 14.4 Hz, 2F). <sup>13</sup>C NMR (126 MHz, CD<sub>3</sub>OD) δ = 173.04, 159.86, 158.97, 157.95, 153.54, 152.46, 145.26, 132.40, 131.09, 129.32, 129.26, 128.29, 128.26, 127.19, 126.91, 124.99, 124.88, 122.26, 117.57, 116.14, 113.78, 110.97, 99.66, 77.87, 71.37, 71.30, 70.94, 70.51, 47.19, 45.34, 44.04, 41.76, 40.43, 37.62, 31.41. HRMS (ESI): m/z calculated for C<sub>53</sub>H<sub>53</sub>F<sub>4</sub>N<sub>6</sub>O<sub>6</sub>S (M<sup>+</sup>): 977.3678; found: 977.3669.

# Compound 2 (Boc-pH) <sup>1</sup>H-NMR in MeOD

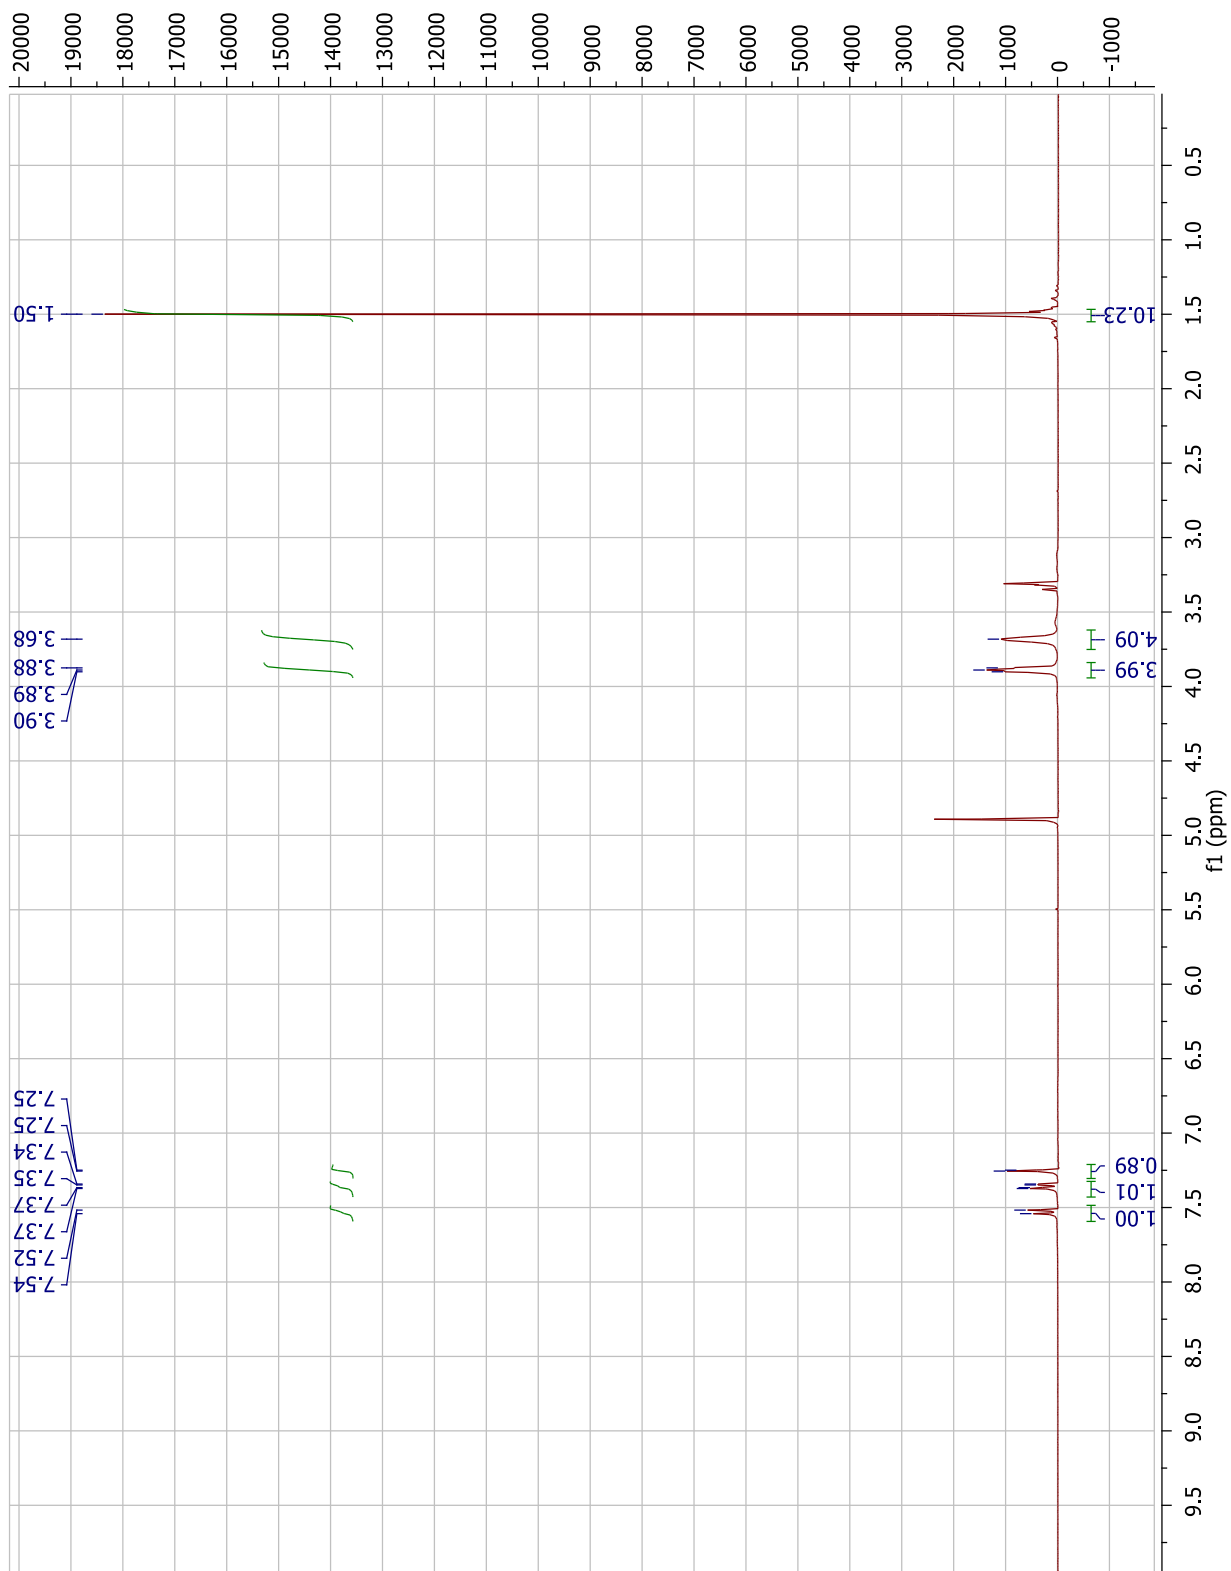

# Compound 2 (Boc-pH) <sup>19</sup>F-NMR in MeOD

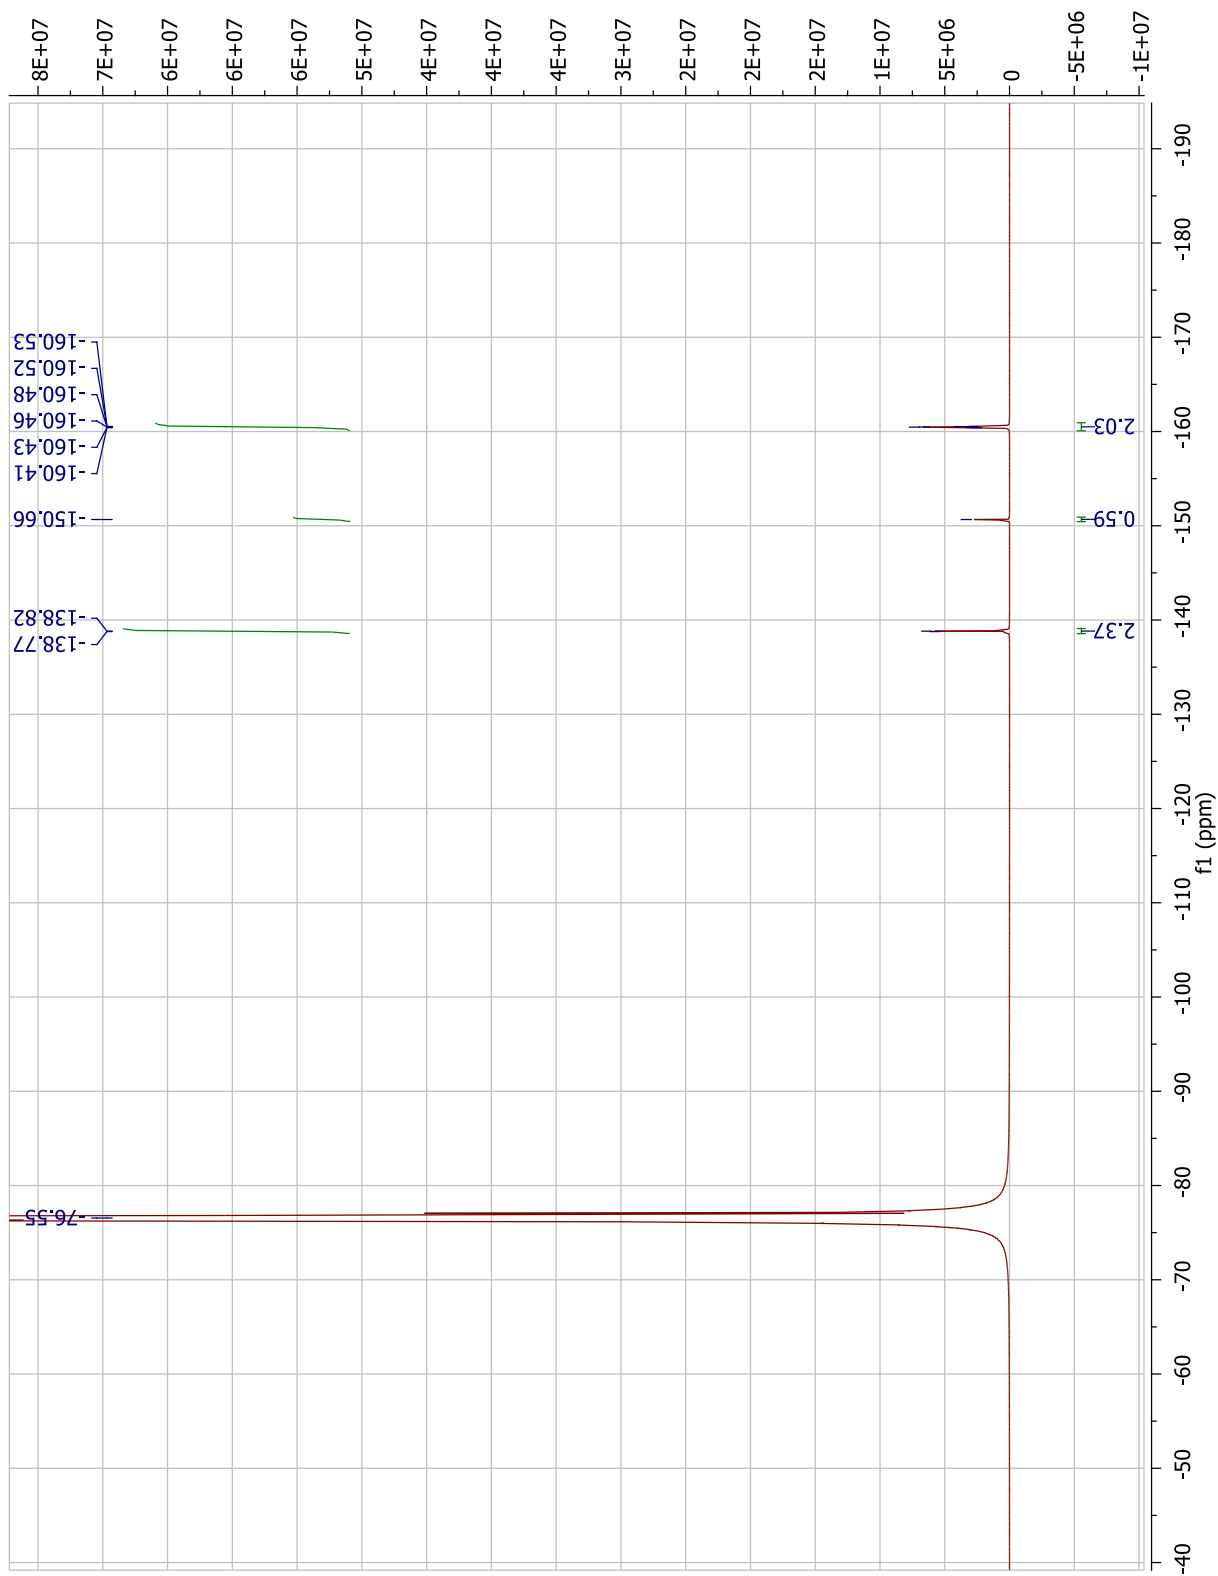

# Compound 2 (Boc-pH) $^{13}\text{C}$ -NMR in MeOD

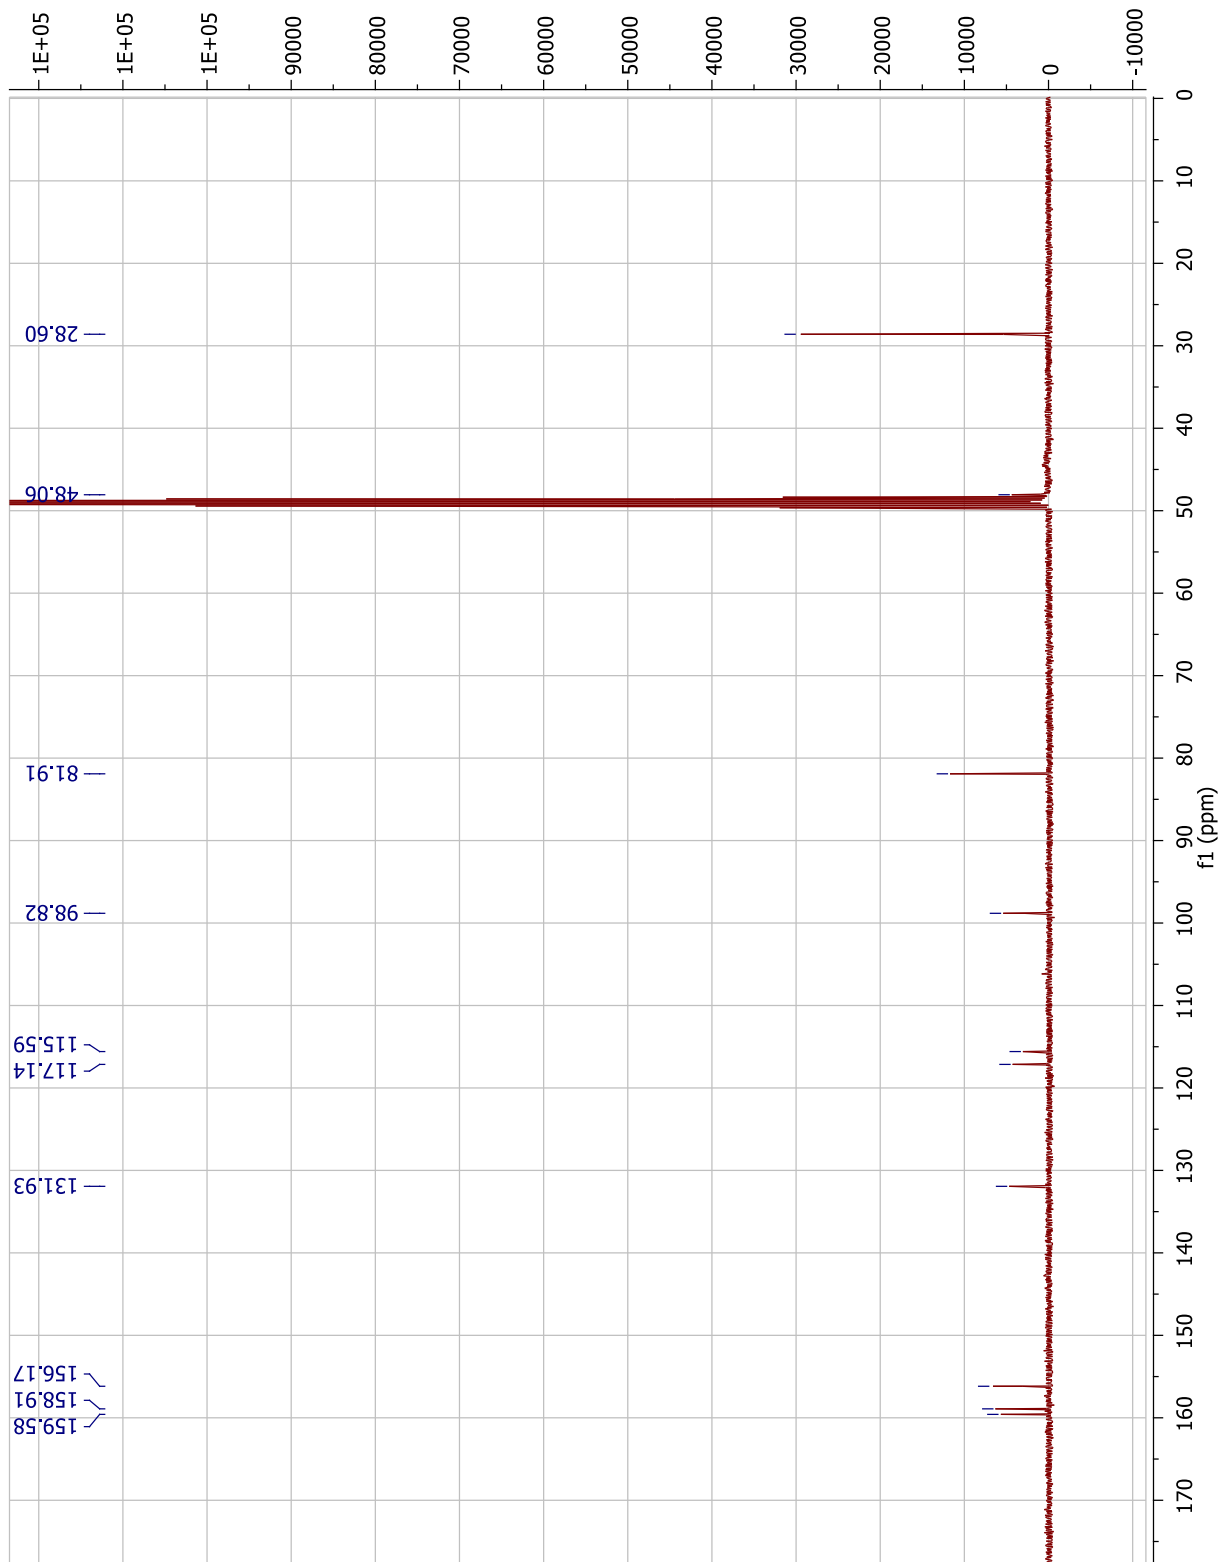

# Compound 3(Boc-pH-COOH) <sup>1</sup>H-NMR in MeOD

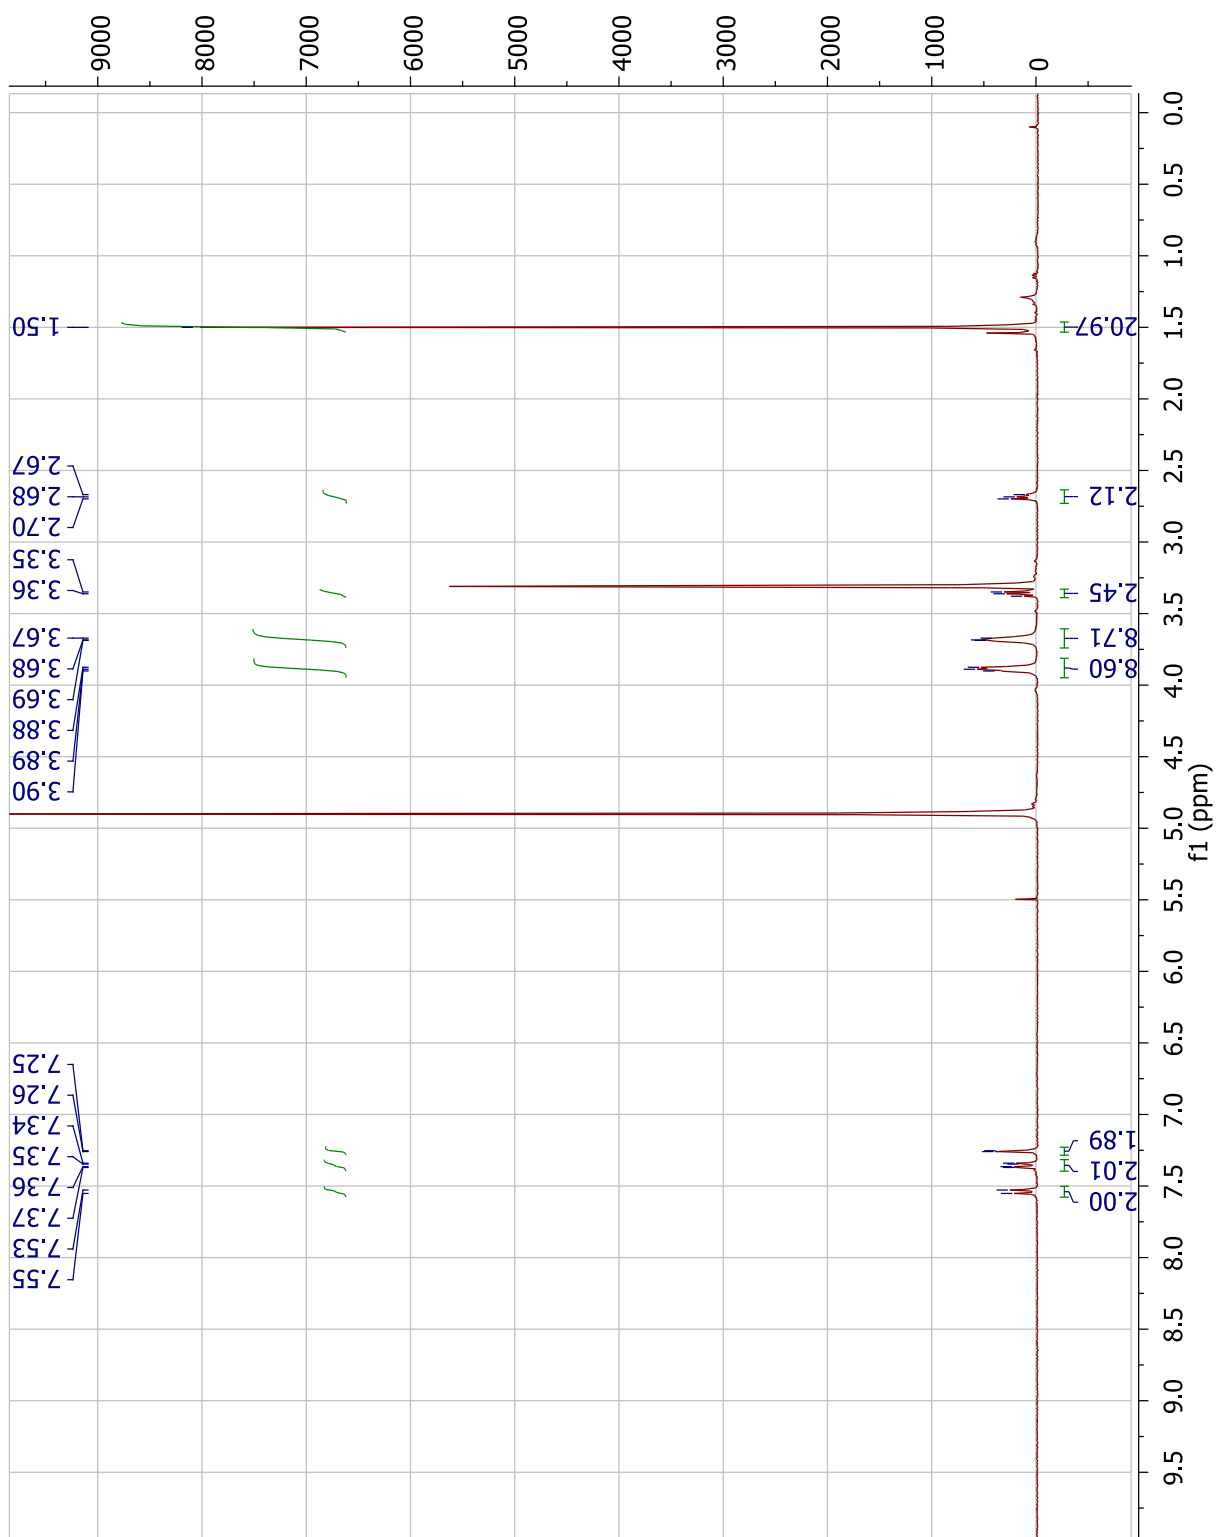

# Compound 3 (Boc-pH-COOH) <sup>9</sup>F-NMR in MeOD

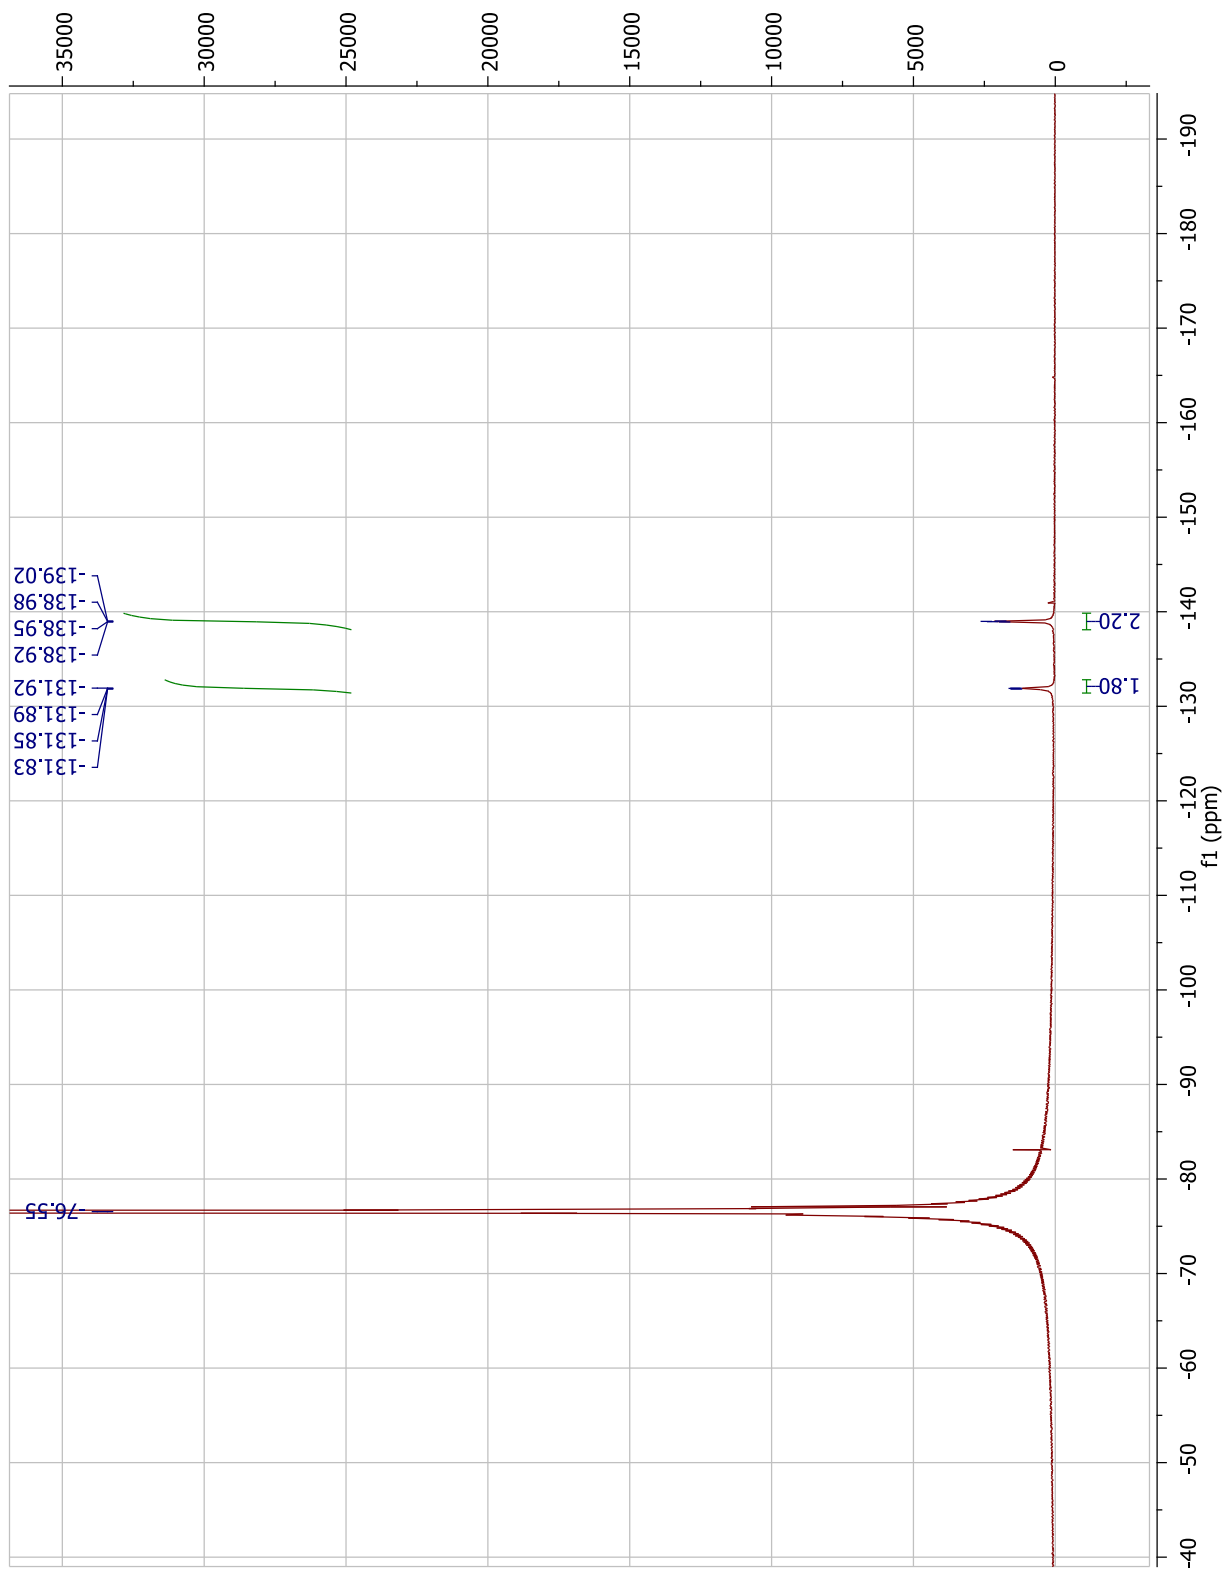



# Compound 3 (Boc-pH-COOH) $^{13}\text{C}$ -NMR in MeOD

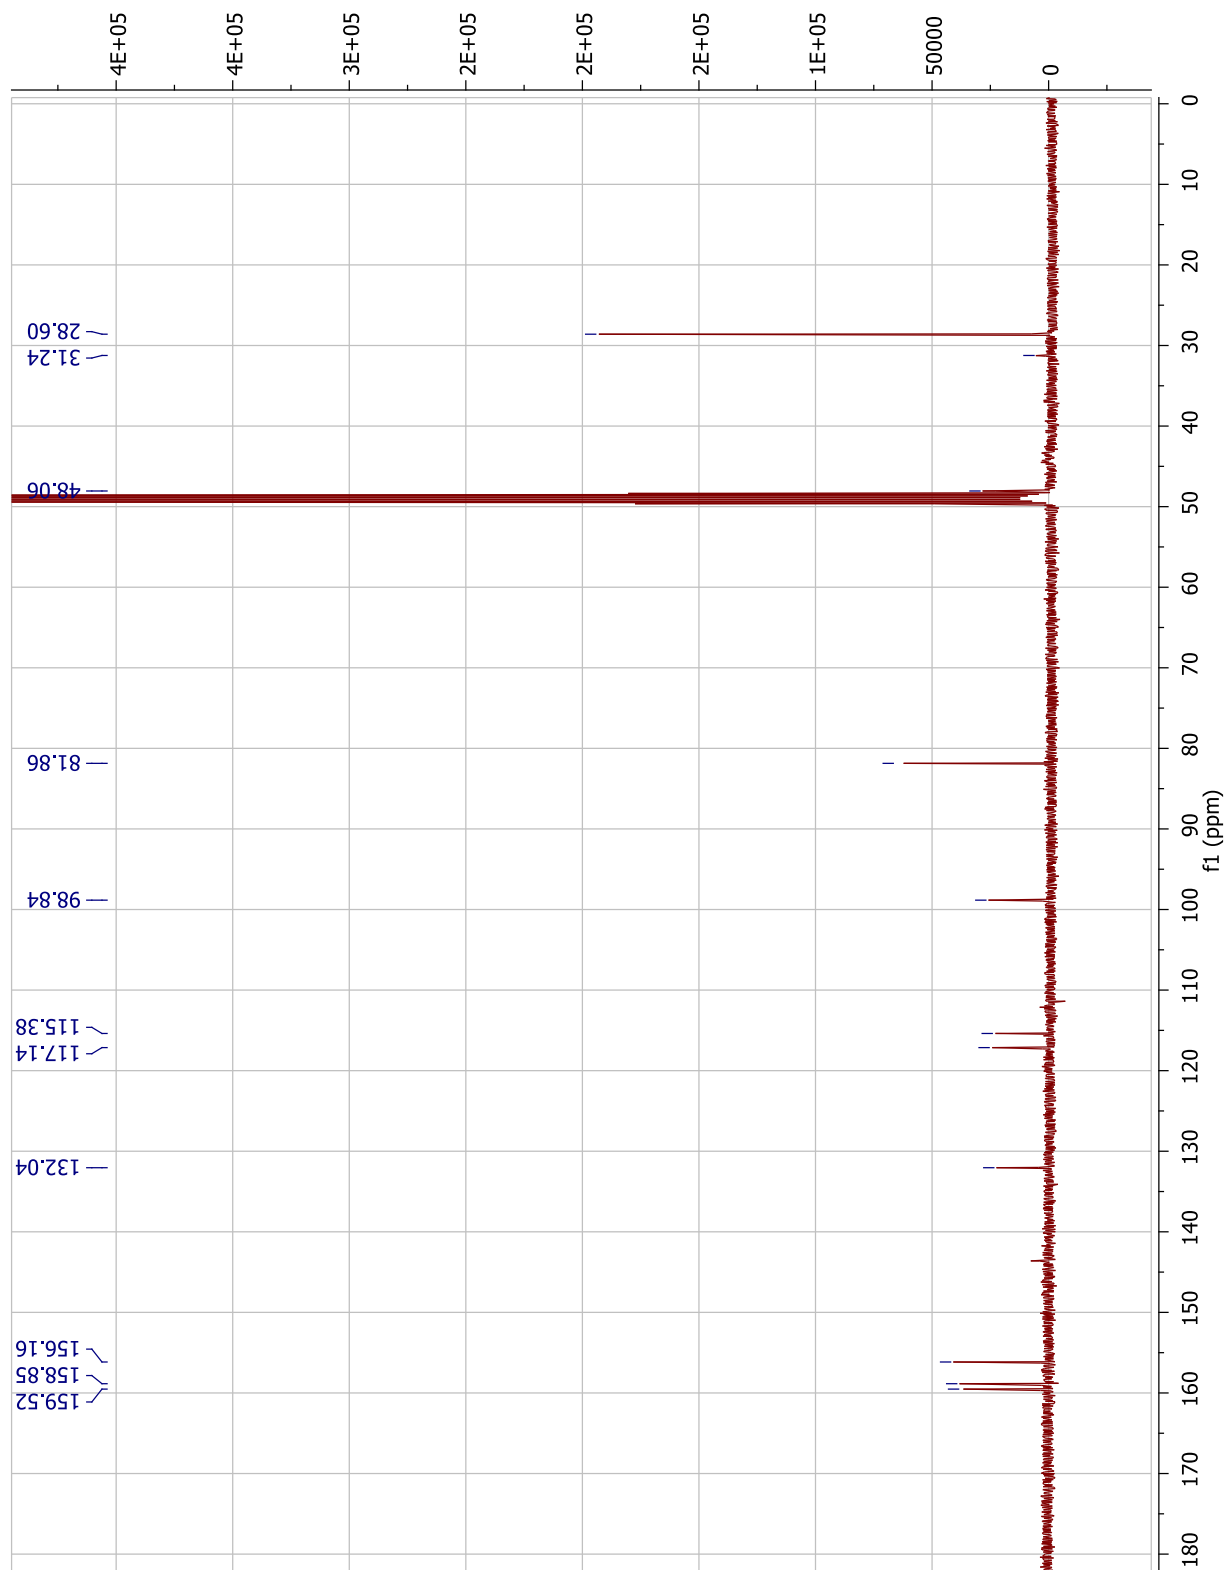

# Compound 4(Boc-pH-NH2) <sup>1</sup>H-NMR in MeOD

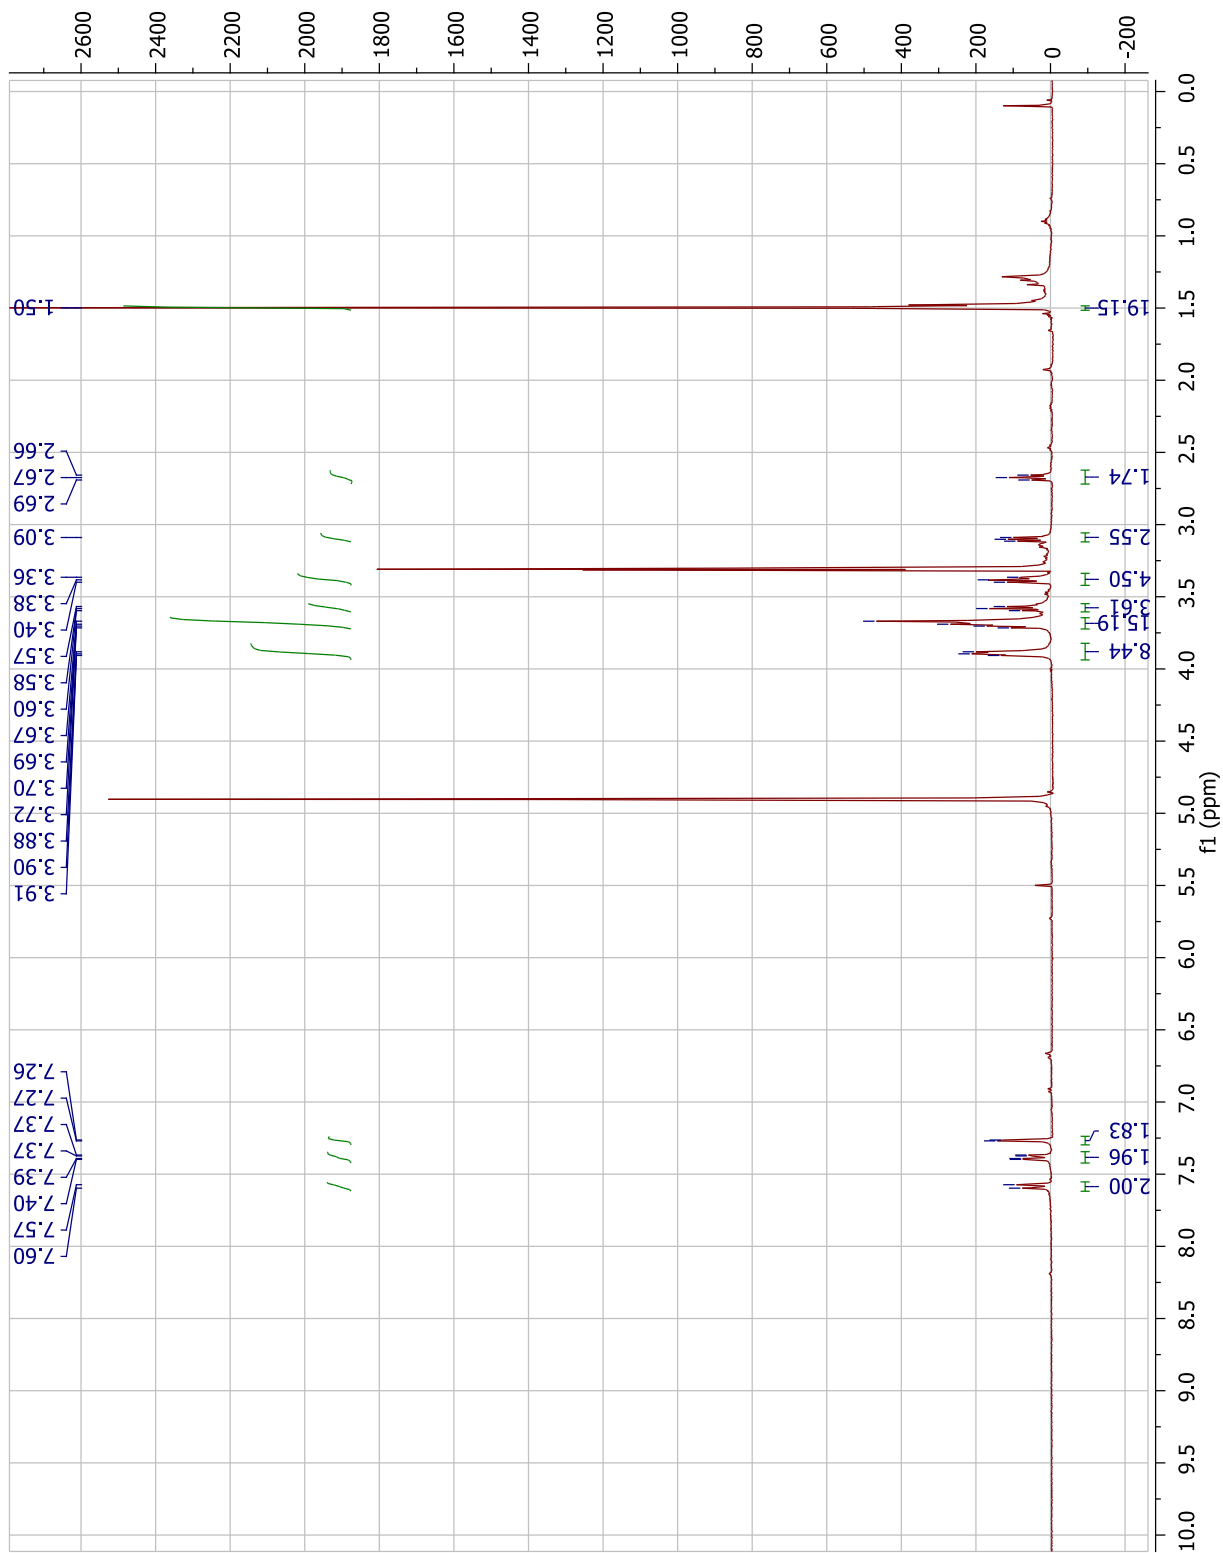

# Compound 4(Boc-pH-NH2) <sup>9</sup>F-NMR in MeOD

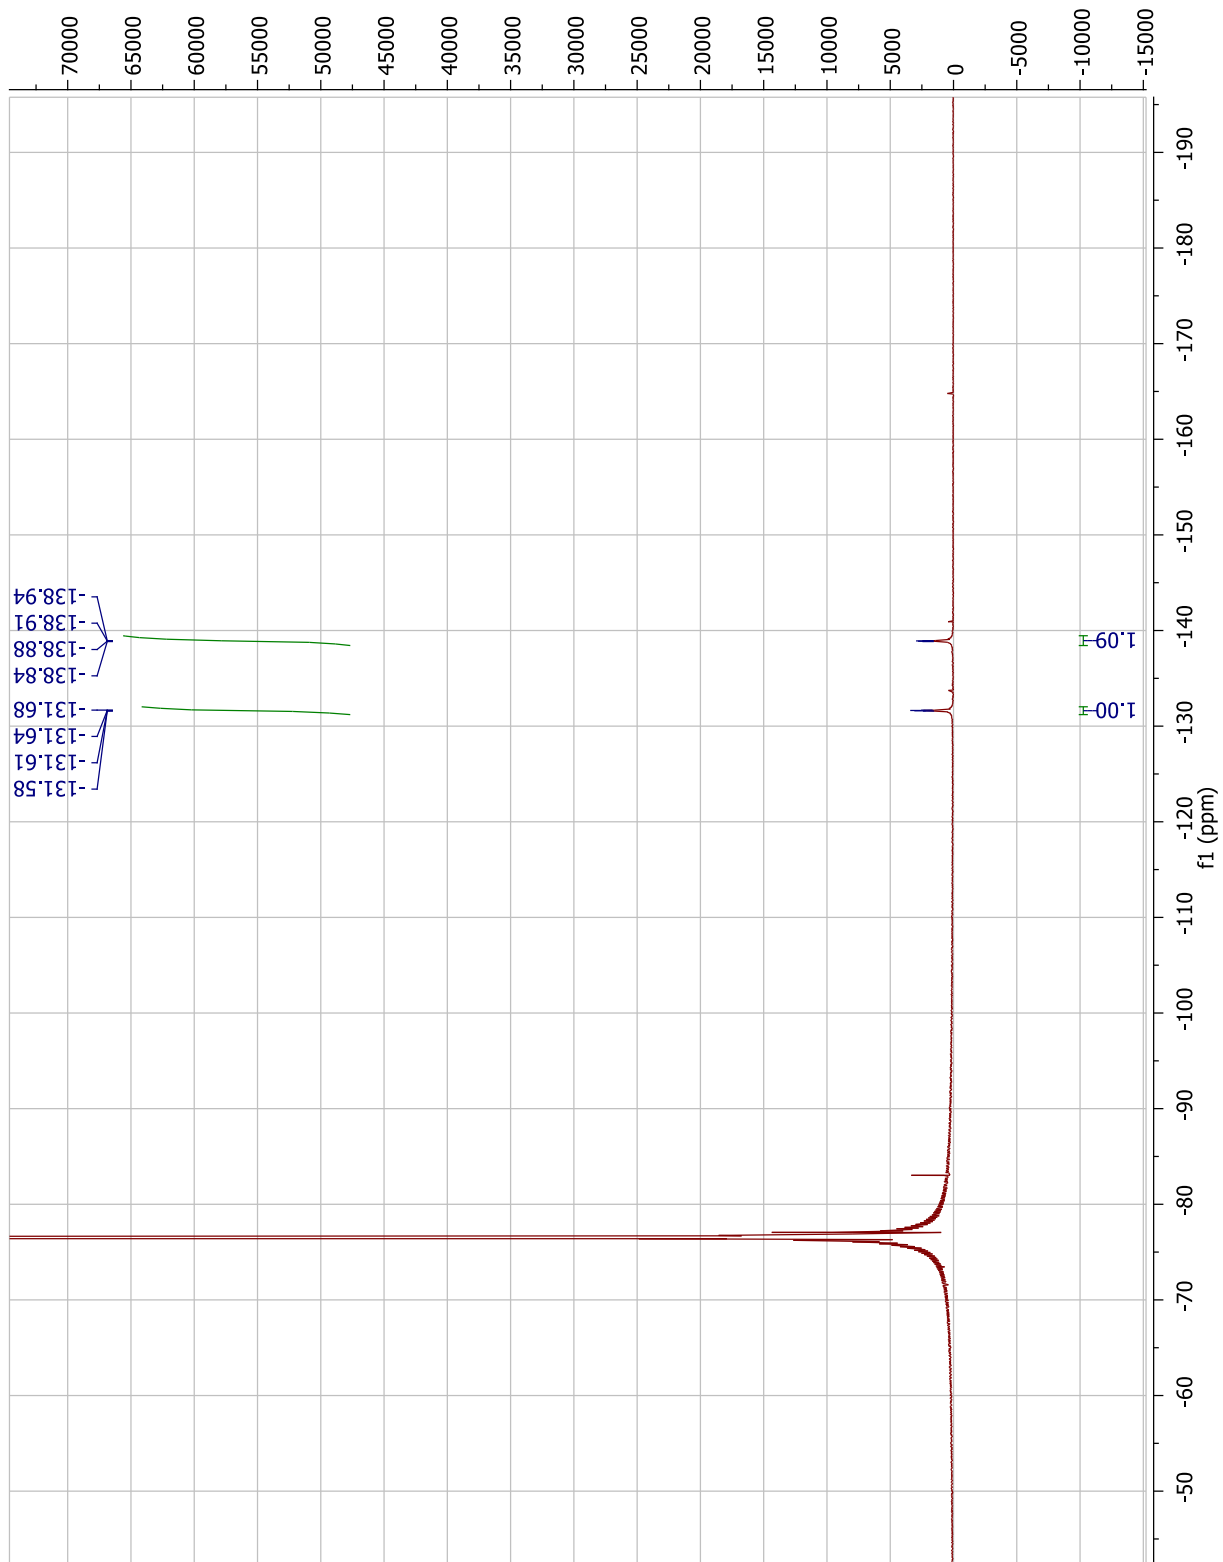

# Compound 4(Boc-pH-NH2) $^{13}\text{C}$ -NMR in MeOD

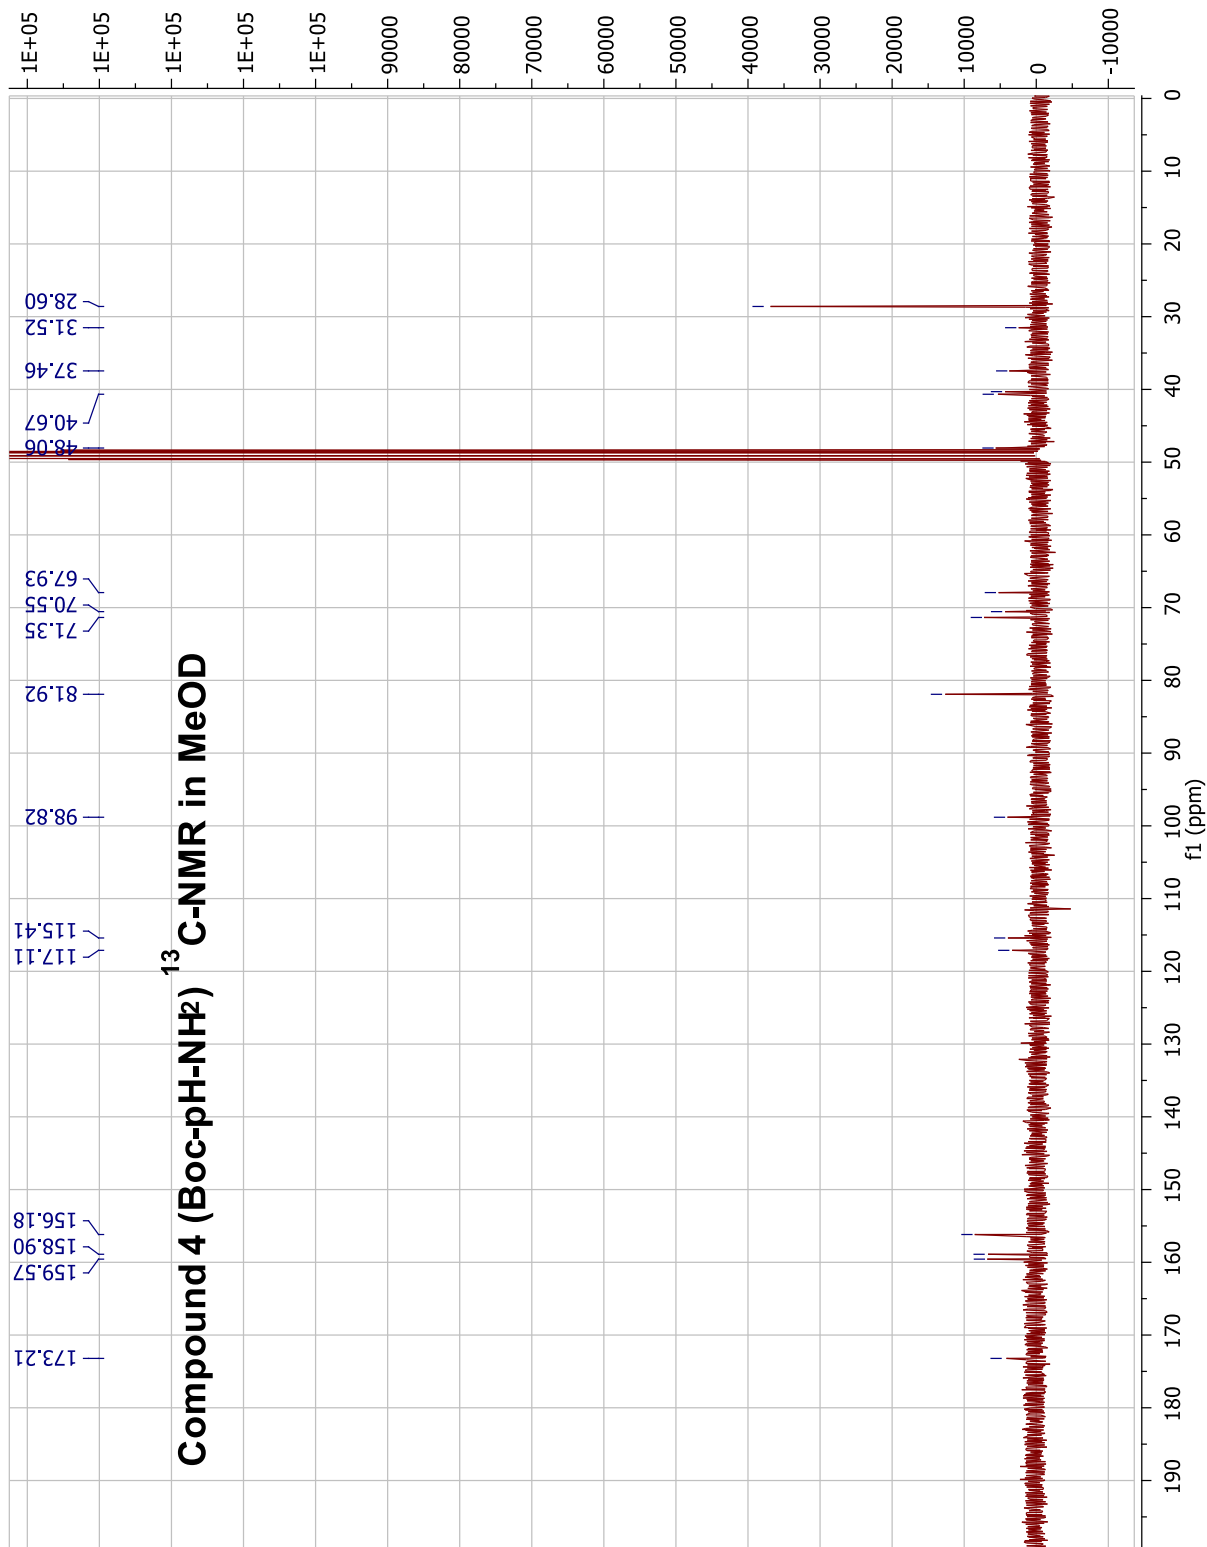

# Compound 5(Boc-pH-DIBO) <sup>1</sup>H-NMR in MeOD

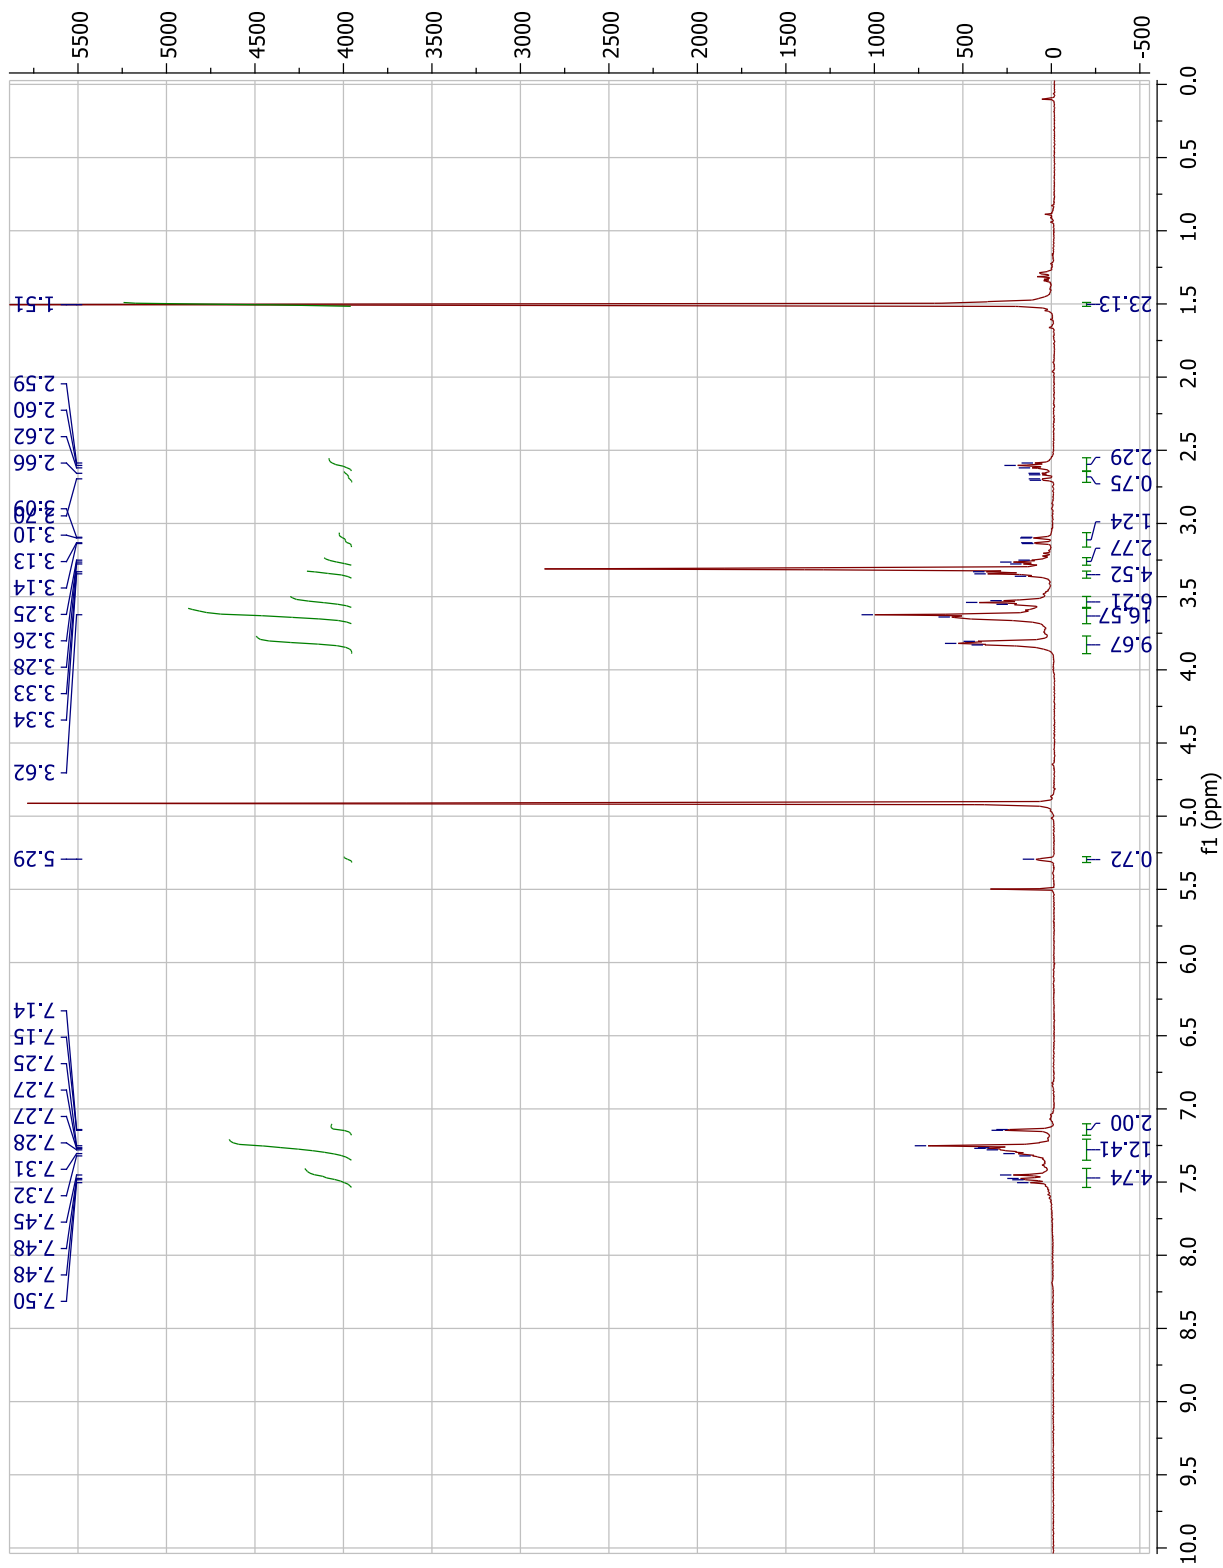

# Compound 5(Boc-pH-DIBO) <sup>9</sup>F-NMR in MeOD

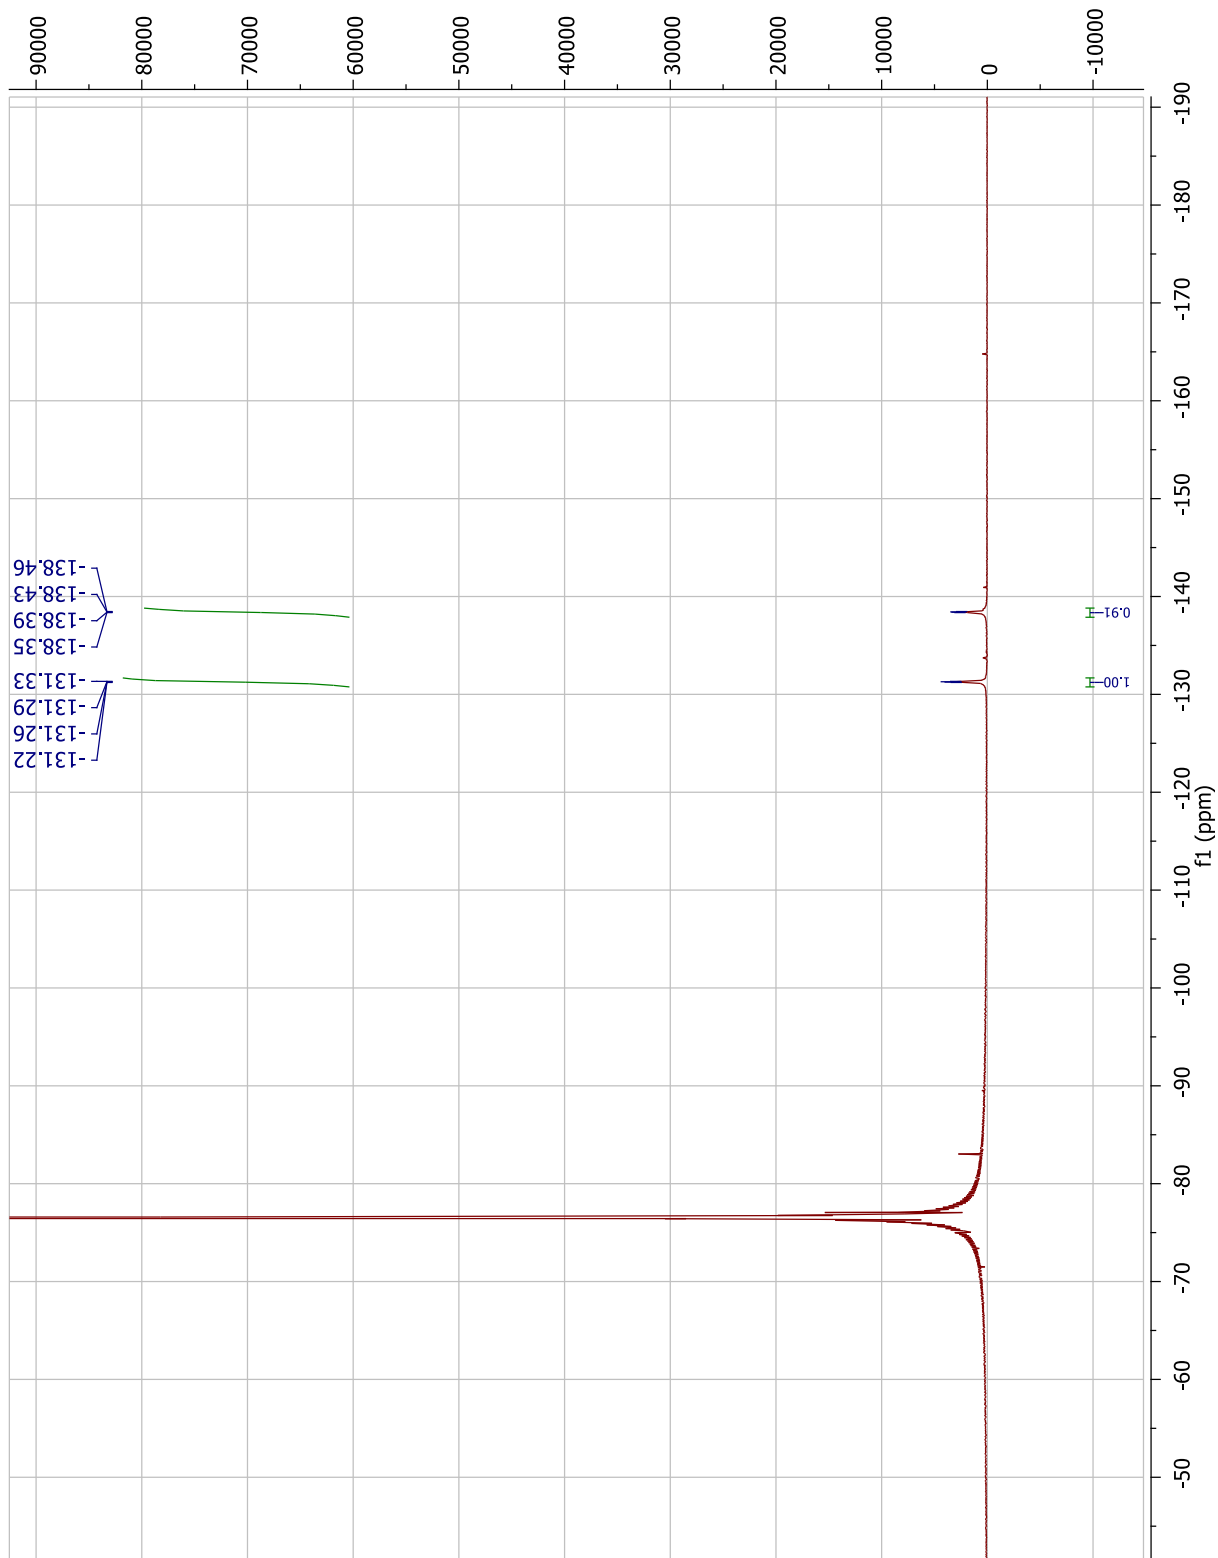

# Compound 5(Boc-pH-DIBO) $^{13}\text{C}$ -NMR in $\text{CDCl}_3$

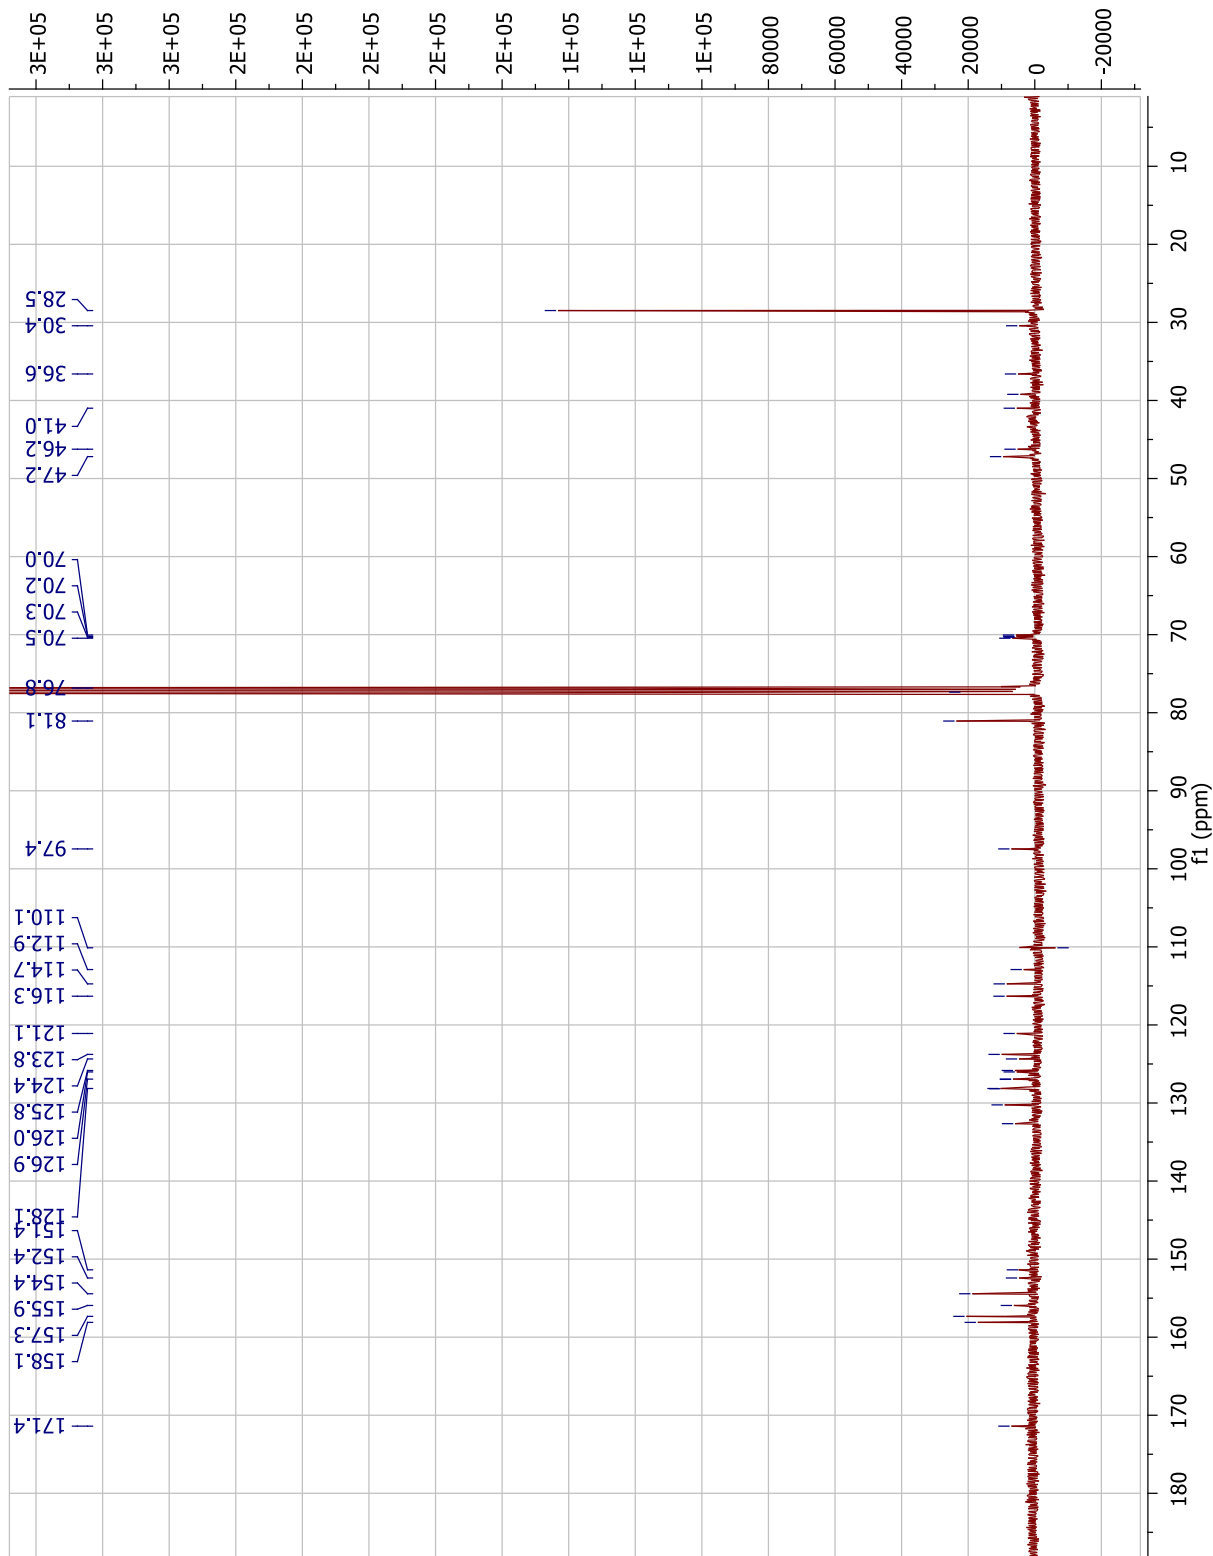

# Compound 6(pH-DIBO) <sup>1</sup>H-NMR in MeOD

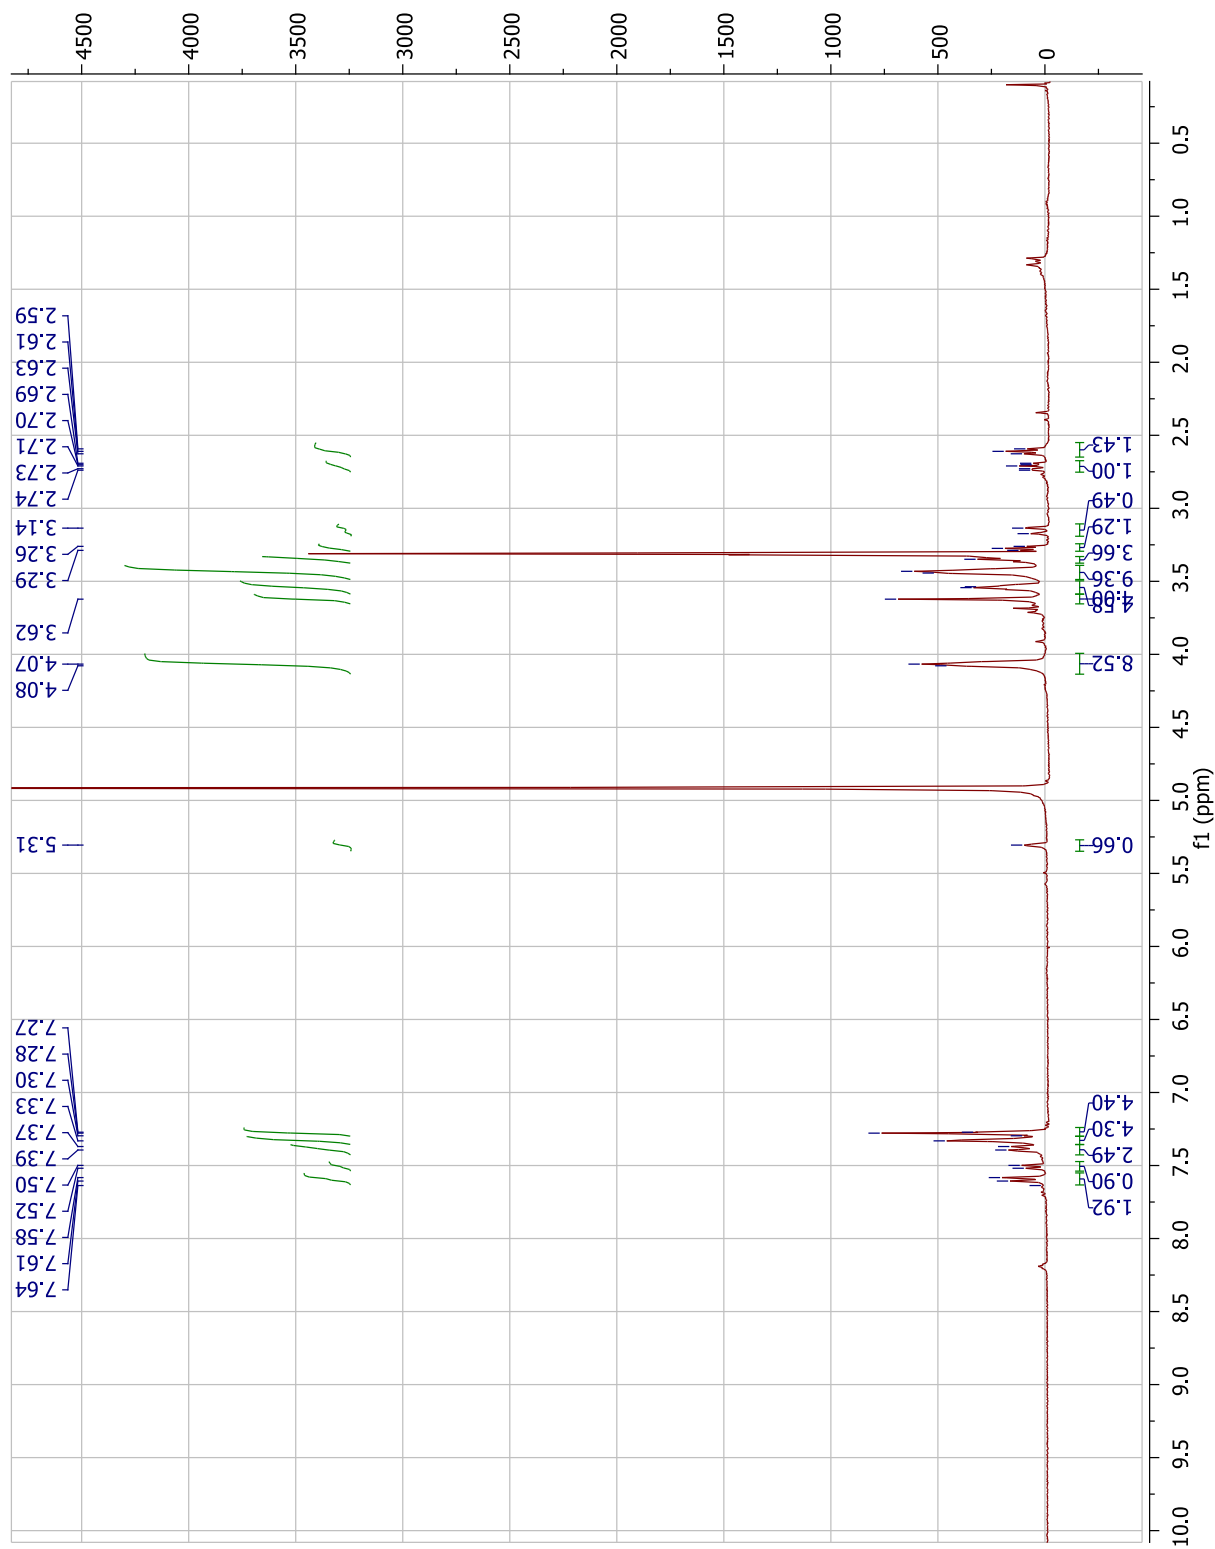



# Compound 6(pH-DIBO) <sup>9</sup>F-NMR in MeOD

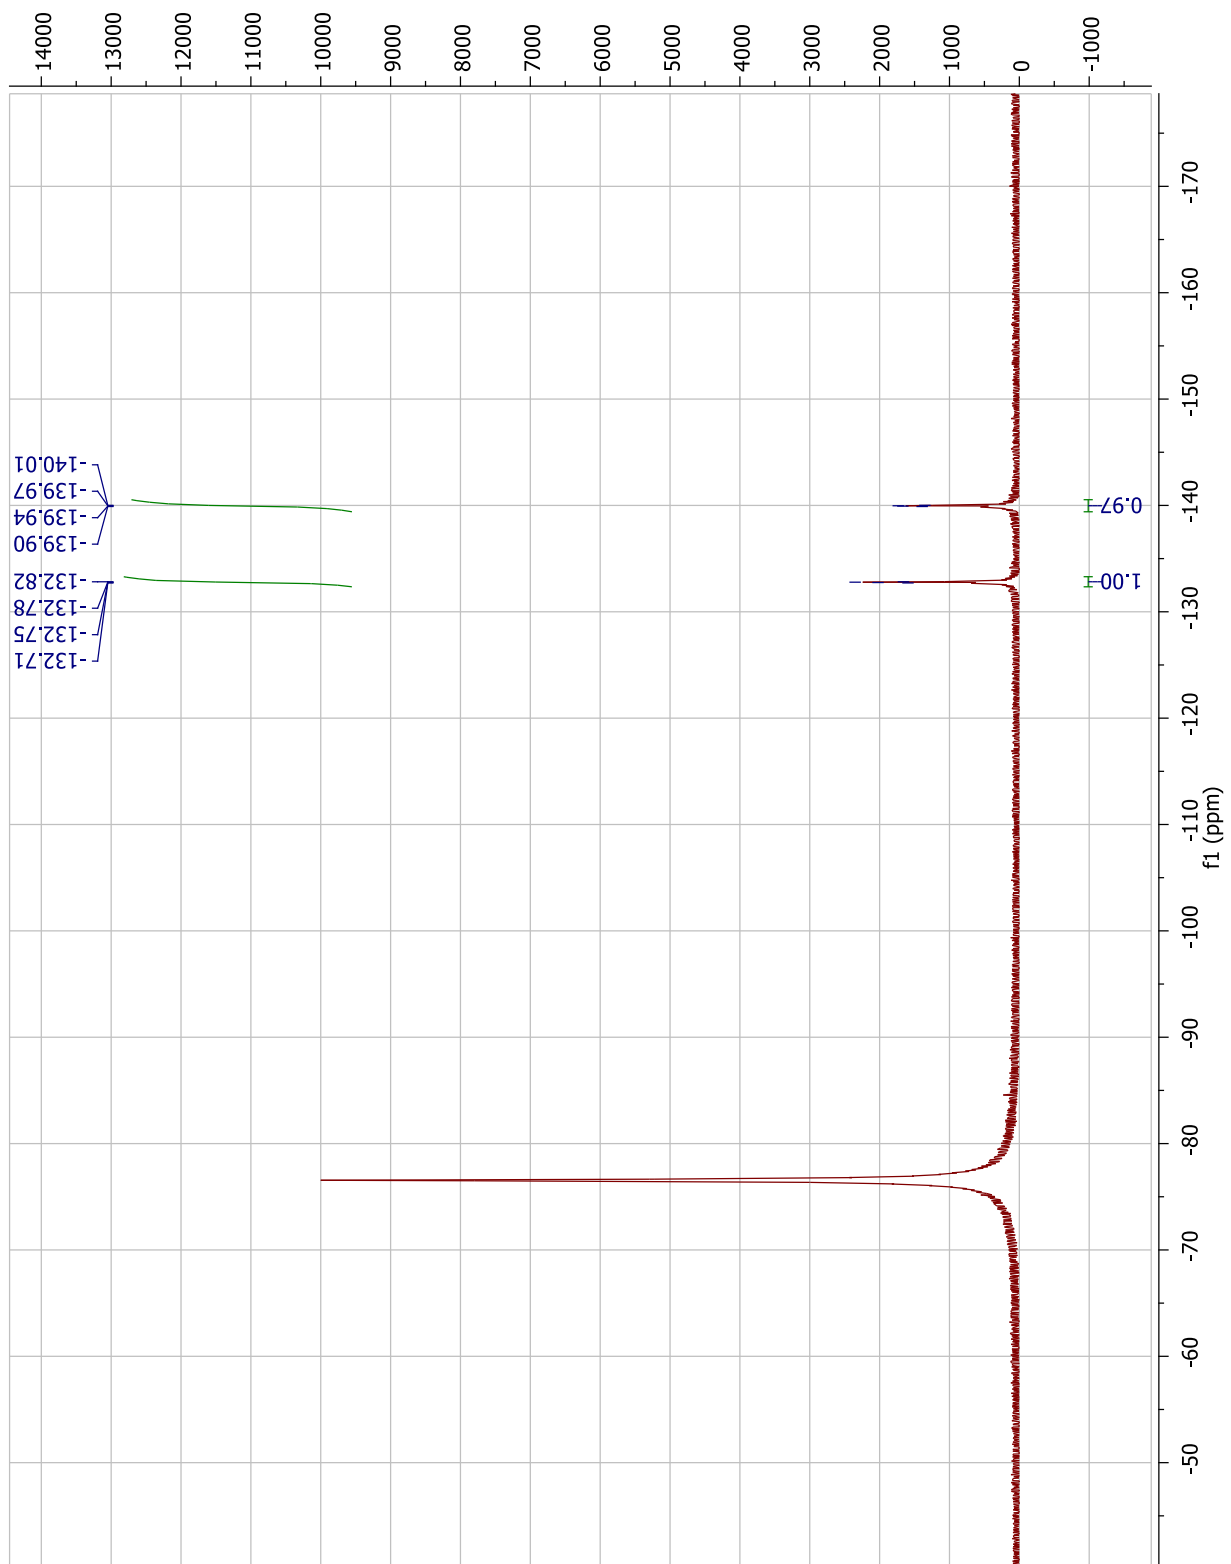

# Compound 6(pH-DIBO) <sup>13</sup>C-NMR in MeOD

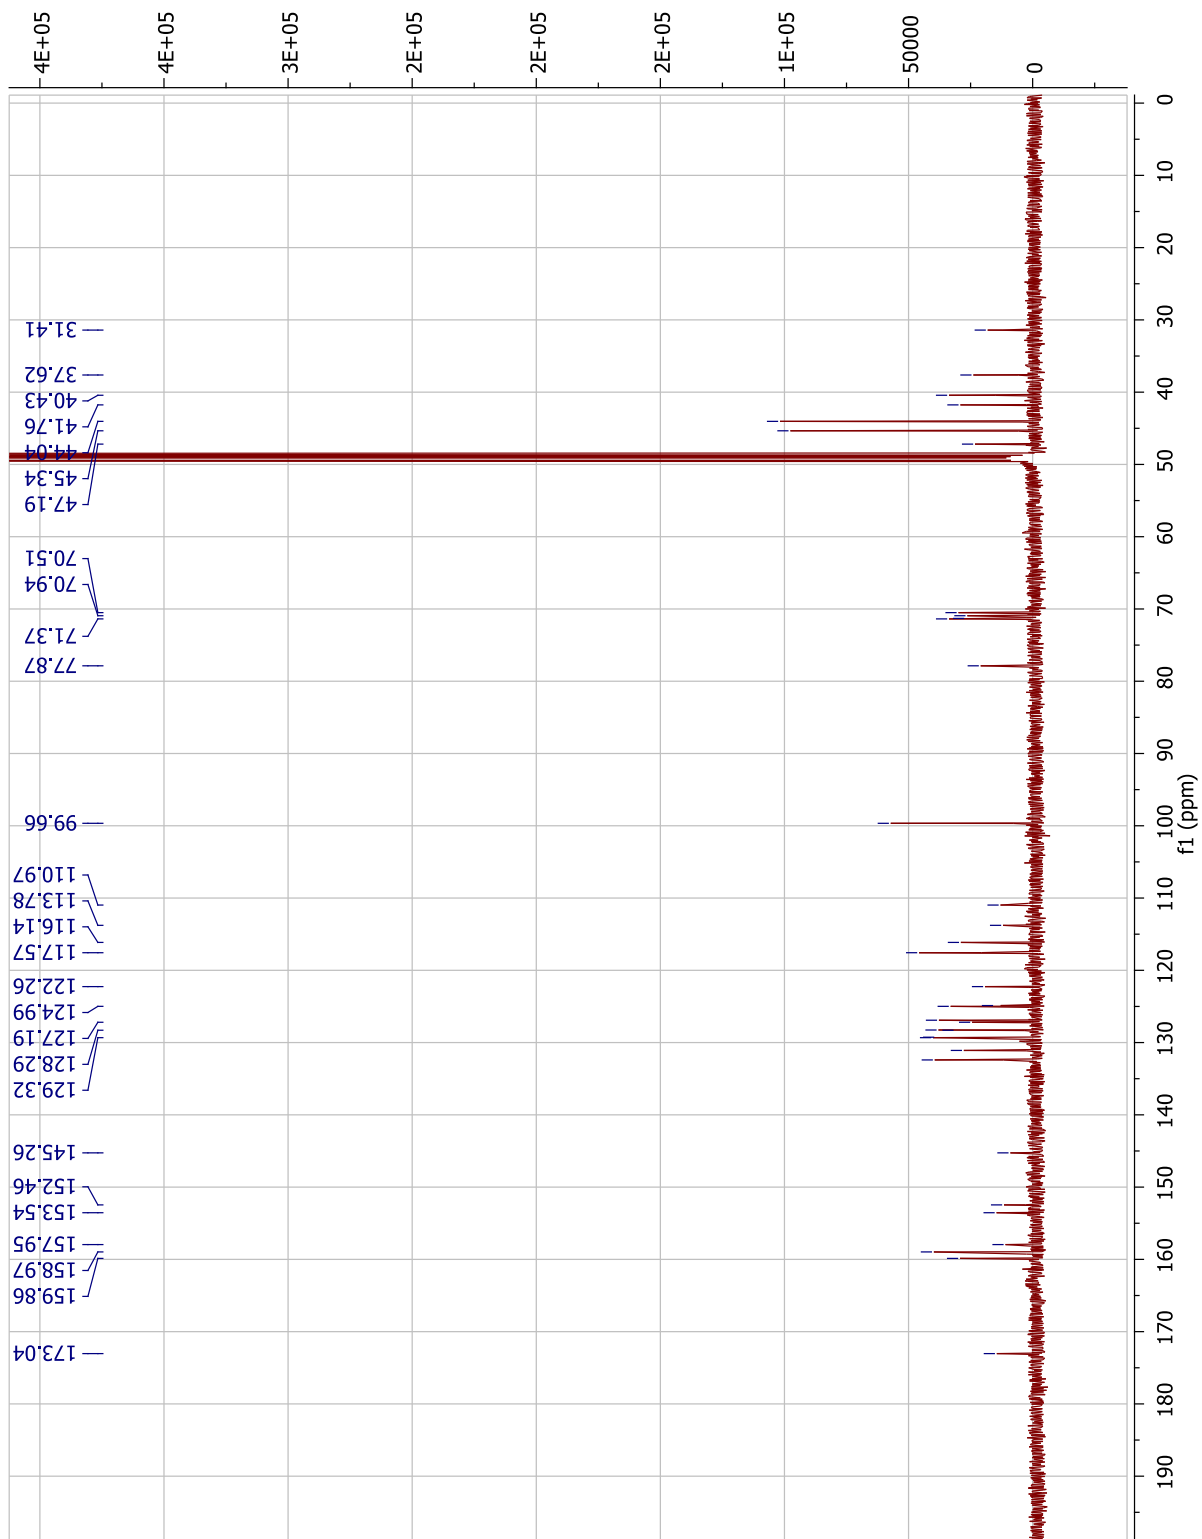

Supplement: NIHMS831354-supplement-1.pdf [file NIHMS831354-supplement-1.pdf]
